# Supplementary material for: Stability and self-passivation of copper vanadate photoanodes under chemical, electrochemical, and photoelectrochemical operation
Source: Royal Society of Chemistry journal article supplement (doi:10.1039/c6cp00473c), 2016-01-01
Supplement: c6cp00473c2.xlsx [file c6cp00473c2.xlsx]

## Sheet: Fig2a_XRD_PhasePercents
position_mm	V2O5	CuV2O6	Z-Cu2V2O7	B-Cu2V2O7	Cu3V2O8	Cu11V6O26	Cu5V2O10	CuO
-45	86	14	0	0	0	0	0	0
-38.57	69.2	30.8	0	0	0	0	0	0
-32.14	0	90	10	0	0	0	0	0
-25.71	0	8.6	0	91.4	0	0	0	0
-19.29	0	0	10.2	89.8	0	0	0	0
-12.86	0	0	21.1	0	78.9	0	0	0
-6.43	0	0	0	0	74.6	25.4	0	0
0	0	0	0	0	0	0	70.5	29.5
6.43	0	0	0	0	0	0	49.7	50.3
12.86	0	0	0	0	0	0	35.6	64.4
19.29	0	0	0	0	0	0	21.4	78.6

## Sheet: Fig2a_XRF_compositions
position_mm	XRF_V_percent_post	XRF_V_percent_pre
-41.79	66.56	74.68
-38.57	67.55	74.06
-35.36	65.03	70.39
-32.14	65.95	67.46
-28.93	62.71	64.64
-25.72	60.33	60.75
-22.5	56.12	56.73
-19.29	51.16	51.64
-16.07	46.9	48.6
-12.86	42.73	44.43
-9.65	38.79	40.89
-6.43	35.16	36.26
-3.22	31.31	33.61
0	27.29	29.55
3.21	25.74	25.68
6.42	21.3	23.58
9.64	18.64	19.11
12.85	16.69	17.51
16.07	14.43	14.68
19.28	12.3	12.99

## Sheet: Fig2a_XPS_compositions
position_mm	XPS_V_percent_pre	XPS_V_percent_post
-45	99.1	57.02
-32.14	67.63	52.53
-25.71	57.62	47.57
-12.86	46.94	41.26
19.29	20.05	13.92

## Sheet: Fig2b_XRD_PhasePercents
position_mm	V2O5	CuV2O6	Z-Cu2V2O7	Cu3V2O8	Cu11V6O26	Cu5V2O10
-43	37.3	62.7	0	0	0	0
-34.4	15.9	84.1	0	0	0	0
-25.8	0	90.6	9.4	0	0	0
-20	0	77.5	22.5	0	0	0
-17.2	0	43.1	56.9	0	0	0
-8.6	0	22.1	77.9	0	0	0
0	0	0	100	0	0	0
5	0	0	91.1	8.9	0	0
8.6	0	0	74.8	25.2	0	0
17.2	0	0	22.4	77.6	0	0
23	0	0	0	37.9	62.1	0
25.8	0	0	0	0	100	0
34.4	0	0	0	0	31.4	68.6
43	0	0	0	0	0	100

## Sheet: Fig2b_XRF_compositions
position_mm	XRF_V_percent_post	XRF_V_percent_pre
-38.31	57.38	66.78
-36.22	56.65	65.61
-34.13	56.99	64.72
-32.04	56.81	64.41
-29.94	56.82	62.75
-27.85	57.09	61.95
-25.76	57.3	60.77
-23.66	57.28	59.63
-21.57	56.57	58.29
-19.48	56.59	57.16
-17.38	56.45	57.02
-15.29	54.48	55
-13.2	54.16	54.01
-11.1	52.73	51.89
-9.01	50.82	51.21
-6.92	49.92	49.56
-4.83	49.2	48.69
1.45	44.38	44.46
3.55	43.22	44.07
5.64	41.84	42.44
7.73	40.89	41.01
9.83	39.7	39.19
11.92	38.2	38.25
14.01	37.64	37
16.1	36.15	36.38
18.2	34.39	35.07
20.29	33.11	33.77
22.38	32.39	32.73
24.48	31.54	31.57
26.57	30.86	30.37
28.66	29.21	28.94
30.76	28.51	27.97
32.85	27.32	27.64
34.94	26.18	26.5
37.03	25.22	26.19
39.13	24.36	24.03
41.22	23.87	23.75

## Sheet: Fig2c_XRD_PhasePercents
position_mm	CuV2O6	Z-Cu2V2O7	Cu3V2O8	Cu11V6O26	Cu5V2O10	CuO
-45	67	33	0	0	0	0
-40.5	58.4	41.6	0	0	0	0
-31.5	42.7	57.3	0	0	0	0
-27	22.5	77.5	0	0	0	0
-22.5	3.3	96.7	0	0	0	0
-18	0	100	0	0	0	0
-13.5	0	83.8	16.2	0	0	0
-9	0	69.2	30.8	0	0	0
-4.5	0	17.7	82.3	0	0	0
-3	0	0	100	0	0	0
0	0	0	66.9	33.1	0	0
4.5	0	0	34.9	65.1	0	0
6	0	0	0	100	0	0
9	0	0	0	61.7	38.3	0
13.5	0	0	0	32.7	67.3	0
18	0	0	0	0	100	0
22.5	0	0	0	0	80.6	19.4
27	0	0	0	0	74.4	25.6
31.5	0	0	0	0	69.2	30.8
36	0	0	0	0	63.3	36.7
40.5	0	0	0	0	58.3	41.7
45	0	0	0	0	54.4	45.6

## Sheet: Fig2c_EDS_compositions
position_mm	EDX_V_percent_post	EDX_V_percent_pre
-18	48.03	46.61
-3	37.82	38.93
6	31.05	34.57
18	25.64	29.21

## Sheet: Fig2c_XPS_compositions
position_mm	XPS_V_percent_post	XPS_V_percent_pre
-18		50.27
-3	24.3	42.12
6	26.37	35.24
18		28.91

## Sheet: Fig3_XRF_counts
position_mm	V_counts_post	Cu_counts_post	V_counts_pre	Cu_counts_pre	V_counts_change_percentage	Cu_counts_change_percentage
-38.31	217.745	169.805	333.649	168.56	-34.7383	0.738609
-36.22	223.097	179.738	334.77	178.946	-33.3581	0.442592
-34.13	239.86	190.368	336.077	187.386	-28.6295	1.59137
-32.04	242.468	193.904	338.046	191.315	-28.2737	1.35327
-29.94	254.688	203.645	333.532	203.968	-23.6391	-0.158358
-27.85	266.101	210.216	331.439	210.32	-19.7134	-0.0494485
-25.76	281.159	220.05	325.595	218.115	-13.6476	0.887147
-23.66	289.795	227.049	321.46	226.74	-9.85037	0.136279
-21.57	294.769	238.291	313.93	235.115	-6.10359	1.35083
-19.48	302.249	244.062	310.029	244.151	-2.50944	-0.0364529
-17.38	308.162	250.395	312.056	247.313	-1.24785	1.24619
-15.29	296.468	262.724	298.345	258.434	-0.629137	1.66
-13.2	295.224	265.303	293.179	265.194	0.697526	0.041102
-11.1	288.971	276.344	282.591	280.349	2.25768	-1.42858
-9.01	277.544	288.456	279.185	285.298	-0.587782	1.10691
-6.92	270.84	292.618	270.624	297.058	0.0798155	-1.49466
-4.83	269.343	300.291	265.856	303.05	1.31161	-0.910411
1.45	243.668	335.087	239.891	328.72	1.57447	1.93691
3.55	230.648	333.719	240.07	334.654	-3.92469	-0.279393
5.64	222.25	341.801	226.071	338.581	-1.69018	0.951028
7.73	223.825	359.158	221.411	353.416	1.09028	1.62471
9.83	216.049	365.671	210.742	365.039	2.51825	0.173132
11.92	206.124	373.422	205.269	371.071	0.416527	0.633571
14.01	199.846	371.548	199.488	381.861	0.179459	-2.70072
16.1	194.922	388.125	193.597	381.437	0.684411	1.75337
18.2	183.764	397.625	188.739	395.439	-2.63592	0.552803
20.29	169.092	389.031	177.294	395.122	-4.62621	-1.54155
22.38	171.189	407.842	172.761	404.749	-0.909928	0.764177
24.48	166.427	413.47	166.071	411.95	0.214366	0.368977
26.57	163.194	419.473	159.976	421.328	2.01155	-0.440275
28.66	151.442	423.349	149.991	425.092	0.967391	-0.410029
30.76	147.701	428.131	146.127	435.752	1.07715	-1.74893
32.85	143.067	441.68	143.083	434.228	-0.0111823	1.71615
34.94	134.459	441.633	137.4	443.419	-2.14047	-0.402779
37.03	126.034	436.738	131.938	433.121	-4.47483	0.835102
39.13	125.803	457.721	119.152	441.808	5.58195	3.60179
41.22	118.521	443.526	116.411	438.678	1.81254	1.10514

## Sheet: XPS_LibraryC_V38_pre_survey
wide
	Characteristic Energy eV	1486.6	Acquisition Time s	0.4
KE_wide	BE_wide	CPS_wide	wide_1_wide	Background_wide	Envelope_wide
286.345	1200.26	83370	83370	83370	83370
286.845	1199.76	83677.5	83677.5	83677.5	83677.5
287.345	1199.26	83620	83620	83620	83620
287.845	1198.76	83442.5	83442.5	83442.5	83442.5
288.345	1198.26	83670	83670	83670	83670
288.845	1197.76	83867.5	83867.5	83867.5	83867.5
289.345	1197.26	84550	84550	84550	84550
289.845	1196.76	84037.5	84037.5	84037.5	84037.5
290.345	1196.26	83952.5	83952.5	83952.5	83952.5
290.845	1195.76	84195	84195	84195	84195
291.345	1195.26	84190	84190	84190	84190
291.845	1194.76	84730	84730	84730	84730
292.345	1194.26	85070	85070	85070	85070
292.845	1193.76	84822.5	84822.5	84822.5	84822.5
293.345	1193.26	85457.5	85457.5	85457.5	85457.5
293.845	1192.76	84640	84640	84640	84640
294.345	1192.26	85240	85240	85240	85240
294.845	1191.76	86315	86315	86315	86315
295.345	1191.26	85557.5	85557.5	85557.5	85557.5
295.845	1190.76	85947.5	85947.5	85947.5	85947.5
296.345	1190.26	86117.5	86117.5	86117.5	86117.5
296.845	1189.76	86127.5	86127.5	86127.5	86127.5
297.345	1189.26	85855	85855	85855	85855
297.845	1188.76	86115	86115	86115	86115
298.345	1188.26	86137.5	86137.5	86137.5	86137.5
298.845	1187.76	85595	85595	85595	85595
299.345	1187.26	86610	86610	86610	86610
299.845	1186.76	86582.5	86582.5	86582.5	86582.5
300.345	1186.26	86302.5	86302.5	86302.5	86302.5
300.845	1185.76	86802.5	86802.5	86802.5	86802.5
301.345	1185.26	86752.5	86752.5	86752.5	86752.5
301.845	1184.76	87015	87015	87015	87015
302.345	1184.26	86590	86590	86590	86590
302.845	1183.76	87087.5	87087.5	87087.5	87087.5
303.345	1183.26	87315	87315	87315	87315
303.845	1182.76	87290	87290	87290	87290
304.345	1182.26	87202.5	87202.5	87202.5	87202.5
304.845	1181.76	86927.5	86927.5	86927.5	86927.5
305.345	1181.26	86832.5	86832.5	86832.5	86832.5
305.845	1180.76	87217.5	87217.5	87217.5	87217.5
306.345	1180.26	87177.5	87177.5	87177.5	87177.5
306.845	1179.76	87402.5	87402.5	87402.5	87402.5
307.345	1179.26	87975	87975	87975	87975
307.845	1178.76	87867.5	87867.5	87867.5	87867.5
308.345	1178.26	87840	87840	87840	87840
308.845	1177.76	88462.5	88462.5	88462.5	88462.5
309.345	1177.26	88600	88600	88600	88600
309.845	1176.76	88652.5	88652.5	88652.5	88652.5
310.345	1176.26	88307.5	88307.5	88307.5	88307.5
310.845	1175.76	88895	88895	88895	88895
311.345	1175.26	89392.5	89392.5	89392.5	89392.5
311.845	1174.76	88992.5	88992.5	88992.5	88992.5
312.345	1174.26	88382.5	88382.5	88382.5	88382.5
312.845	1173.76	88895	88895	88895	88895
313.345	1173.26	88305	88305	88305	88305
313.845	1172.76	88230	88230	88230	88230
314.345	1172.26	89632.5	89632.5	89632.5	89632.5
314.845	1171.76	89422.5	89422.5	89422.5	89422.5
315.345	1171.26	89640	89640	89640	89640
315.845	1170.76	89910	89910	89910	89910
316.345	1170.26	89745	89745	89745	89745
316.845	1169.76	90290	90290	90290	90290
317.345	1169.26	89765	89765	89765	89765
317.845	1168.76	90780	90780	90780	90780
318.345	1168.26	90202.5	90202.5	90202.5	90202.5
318.845	1167.76	89847.5	89847.5	89847.5	89847.5
319.345	1167.26	90602.5	90602.5	90602.5	90602.5
319.845	1166.76	90960	90960	90960	90960
320.345	1166.26	90547.5	90547.5	90547.5	90547.5
320.845	1165.76	90700	90700	90700	90700
321.345	1165.26	90890	90890	90890	90890
321.845	1164.76	90362.5	90362.5	90362.5	90362.5
322.345	1164.26	90495	90495	90495	90495
322.845	1163.76	91222.5	91222.5	91222.5	91222.5
323.345	1163.26	92027.5	92027.5	92027.5	92027.5
323.845	1162.76	91132.5	91132.5	91132.5	91132.5
324.345	1162.26	91307.5	91307.5	91307.5	91307.5
324.845	1161.76	92320	92320	92320	92320
325.345	1161.26	92115	92115	92115	92115
325.845	1160.76	92377.5	92377.5	92377.5	92377.5
326.345	1160.26	91490	91490	91490	91490
326.845	1159.76	92137.5	92137.5	92137.5	92137.5
327.345	1159.26	92522.5	92522.5	92522.5	92522.5
327.845	1158.76	92197.5	92197.5	92197.5	92197.5
328.345	1158.26	91970	91970	91970	91970
328.845	1157.76	92430	92430	92430	92430
329.345	1157.26	92767.5	92767.5	92767.5	92767.5
329.845	1156.76	92495	92495	92495	92495
330.345	1156.26	93577.5	93577.5	93577.5	93577.5
330.845	1155.76	93070	93070	93070	93070
331.345	1155.26	92950	92950	92950	92950
331.845	1154.76	92427.5	92427.5	92427.5	92427.5
332.345	1154.26	92607.5	92607.5	92607.5	92607.5
332.845	1153.76	94235	94235	94235	94235
333.345	1153.26	93237.5	93237.5	93237.5	93237.5
333.845	1152.76	94070	94070	94070	94070
334.345	1152.26	94025	94025	94025	94025
334.845	1151.76	94185	94185	94185	94185
335.345	1151.26	94355	94355	94355	94355
335.845	1150.76	94145	94145	94145	94145
336.345	1150.26	94312.5	94312.5	94312.5	94312.5
336.845	1149.76	94125	94125	94125	94125
337.345	1149.26	95142.5	95142.5	95142.5	95142.5
337.845	1148.76	94697.5	94697.5	94697.5	94697.5
338.345	1148.26	95145	95145	95145	95145
338.845	1147.76	94637.5	94637.5	94637.5	94637.5
339.345	1147.26	94750	94750	94750	94750
339.845	1146.76	95755	95755	95755	95755
340.345	1146.26	96012.5	96012.5	96012.5	96012.5
340.845	1145.76	95952.5	95952.5	95952.5	95952.5
341.345	1145.26	95612.5	95612.5	95612.5	95612.5
341.845	1144.76	95822.5	95822.5	95822.5	95822.5
342.345	1144.26	95905	95905	95905	95905
342.845	1143.76	95752.5	95752.5	95752.5	95752.5
343.345	1143.26	95642.5	95642.5	95642.5	95642.5
343.845	1142.76	96395	96395	96395	96395
344.345	1142.26	96592.5	96592.5	96592.5	96592.5
344.845	1141.76	96470	96470	96470	96470
345.345	1141.26	96800	96800	96800	96800
345.845	1140.76	96882.5	96882.5	96882.5	96882.5
346.345	1140.26	97287.5	97287.5	97287.5	97287.5
346.845	1139.76	97470	97470	97470	97470
347.345	1139.26	97185	97185	97185	97185
347.845	1138.76	97357.5	97357.5	97357.5	97357.5
348.345	1138.26	98317.5	98317.5	98317.5	98317.5
348.845	1137.76	97572.5	97572.5	97572.5	97572.5
349.345	1137.26	98275	98275	98275	98275
349.845	1136.76	97922.5	97922.5	97922.5	97922.5
350.345	1136.26	97717.5	97717.5	97717.5	97717.5
350.845	1135.76	98627.5	98627.5	98627.5	98627.5
351.345	1135.26	98205	98205	98205	98205
351.845	1134.76	97692.5	97692.5	97692.5	97692.5
352.345	1134.26	98422.5	98422.5	98422.5	98422.5
352.845	1133.76	98335	98335	98335	98335
353.345	1133.26	98397.5	98397.5	98397.5	98397.5
353.845	1132.76	98077.5	98077.5	98077.5	98077.5
354.345	1132.26	98530	98530	98530	98530
354.845	1131.76	99387.5	99387.5	99387.5	99387.5
355.345	1131.26	99362.5	99362.5	99362.5	99362.5
355.845	1130.76	99700	99700	99700	99700
356.345	1130.26	99357.5	99357.5	99357.5	99357.5
356.845	1129.76	99985	99985	99985	99985
357.345	1129.26	99832.5	99832.5	99832.5	99832.5
357.845	1128.76	99075	99075	99075	99075
358.345	1128.26	100665	100665	100665	100665
358.845	1127.76	100500	100500	100500	100500
359.345	1127.26	100190	100190	100190	100190
359.845	1126.76	100145	100145	100145	100145
360.345	1126.26	101285	101285	101285	101285
360.845	1125.76	100673	100673	100673	100673
361.345	1125.26	100078	100078	100078	100078
361.845	1124.76	100630	100630	100630	100630
362.345	1124.26	100693	100693	100693	100693
362.845	1123.76	101085	101085	101085	101085
363.345	1123.26	100965	100965	100965	100965
363.845	1122.76	100950	100950	100950	100950
364.345	1122.26	101523	101523	101523	101523
364.845	1121.76	101405	101405	101405	101405
365.345	1121.26	101495	101495	101495	101495
365.845	1120.76	101428	101428	101428	101428
366.345	1120.26	101450	101450	101450	101450
366.845	1119.76	101123	101123	101123	101123
367.345	1119.26	101978	101978	101978	101978
367.845	1118.76	102555	102555	102555	102555
368.345	1118.26	102573	102573	102573	102573
368.845	1117.76	102333	102333	102333	102333
369.345	1117.26	102165	102165	102165	102165
369.845	1116.76	102343	102343	102343	102343
370.345	1116.26	103158	103158	103158	103158
370.845	1115.76	103810	103810	103810	103810
371.345	1115.26	103230	103230	103230	103230
371.845	1114.76	103173	103173	103173	103173
372.345	1114.26	102978	102978	102978	102978
372.845	1113.76	103088	103088	103088	103088
373.345	1113.26	104048	104048	104048	104048
373.845	1112.76	104775	104775	104775	104775
374.345	1112.26	103818	103818	103818	103818
374.845	1111.76	103948	103948	103948	103948
375.345	1111.26	103938	103938	103938	103938
375.845	1110.76	104725	104725	104725	104725
376.345	1110.26	104593	104593	104593	104593
376.845	1109.76	104755	104755	104755	104755
377.345	1109.26	105513	105513	105513	105513
377.845	1108.76	106133	106133	106133	106133
378.345	1108.26	106798	106798	106798	106798
378.845	1107.76	107038	107038	107038	107038
379.345	1107.26	107333	107333	107333	107333
379.845	1106.76	107418	107418	107418	107418
380.345	1106.26	108010	108010	108010	108010
380.845	1105.76	107843	107843	107843	107843
381.345	1105.26	108500	108500	108500	108500
381.845	1104.76	108070	108070	108070	108070
382.345	1104.26	107700	107700	107700	107700
382.845	1103.76	107703	107703	107703	107703
383.345	1103.26	107530	107530	107530	107530
383.845	1102.76	107845	107845	107845	107845
384.345	1102.26	107420	107420	107420	107420
384.845	1101.76	108213	108213	108213	108213
385.345	1101.26	107903	107903	107903	107903
385.845	1100.76	107525	107525	107525	107525
386.345	1100.26	109115	109115	109115	109115
386.845	1099.76	108708	108708	108708	108708
387.345	1099.26	108685	108685	108685	108685
387.845	1098.76	109305	109305	109305	109305
388.345	1098.26	108895	108895	108895	108895
388.845	1097.76	108820	108820	108820	108820
389.345	1097.26	109690	109690	109690	109690
389.845	1096.76	108668	108668	108668	108668
390.345	1096.26	108560	108560	108560	108560
390.845	1095.76	107468	107468	107468	107468
391.345	1095.26	107423	107423	107423	107423
391.845	1094.76	106020	106020	106020	106020
392.345	1094.26	106498	106498	106498	106498
392.845	1093.76	106565	106565	106565	106565
393.345	1093.26	106485	106485	106485	106485
393.845	1092.76	106188	106188	106188	106188
394.345	1092.26	105615	105615	105615	105615
394.845	1091.76	105583	105583	105583	105583
395.345	1091.26	105565	105565	105565	105565
395.845	1090.76	106498	106498	106498	106498
396.345	1090.26	106260	106260	106260	106260
396.845	1089.76	106940	106940	106940	106940
397.345	1089.26	106640	106640	106640	106640
397.845	1088.76	105253	105253	105253	105253
398.345	1088.26	106828	106828	106828	106828
398.845	1087.76	106338	106338	106338	106338
399.345	1087.26	105278	105278	105278	105278
399.845	1086.76	106033	106033	106033	106033
400.345	1086.26	105983	105983	105983	105983
400.845	1085.76	105690	105690	105690	105690
401.345	1085.26	106088	106088	106088	106088
401.845	1084.76	106595	106595	106595	106595
402.345	1084.26	106133	106133	106133	106133
402.845	1083.76	106645	106645	106645	106645
403.345	1083.26	106898	106898	106898	106898
403.845	1082.76	105963	105963	105963	105963
404.345	1082.26	106060	106060	106060	106060
404.845	1081.76	106998	106998	106998	106998
405.345	1081.26	107103	107103	107103	107103
405.845	1080.76	107335	107335	107335	107335
406.345	1080.26	107298	107298	107298	107298
406.845	1079.76	107560	107560	107560	107560
407.345	1079.26	107603	107603	107603	107603
407.845	1078.76	107680	107680	107680	107680
408.345	1078.26	107270	107270	107270	107270
408.845	1077.76	107438	107438	107438	107438
409.345	1077.26	106268	106268	106268	106268
409.845	1076.76	106945	106945	106945	106945
410.345	1076.26	107770	107770	107770	107770
410.845	1075.76	107430	107430	107430	107430
411.345	1075.26	106715	106715	106715	106715
411.845	1074.76	107053	107053	107053	107053
412.345	1074.26	107158	107158	107158	107158
412.845	1073.76	107485	107485	107485	107485
413.345	1073.26	107813	107813	107813	107813
413.845	1072.76	106803	106803	106803	106803
414.345	1072.26	107423	107423	107423	107423
414.845	1071.76	107873	107873	107873	107873
415.345	1071.26	108353	108353	108353	108353
415.845	1070.76	108948	108948	108948	108948
416.345	1070.26	108833	108833	108833	108833
416.845	1069.76	108633	108633	108633	108633
417.345	1069.26	108615	108615	108615	108615
417.845	1068.76	109290	109290	109290	109290
418.345	1068.26	108778	108778	108778	108778
418.845	1067.76	109398	109398	109398	109398
419.345	1067.26	109858	109858	109858	109858
419.845	1066.76	109495	109495	109495	109495
420.345	1066.26	110203	110203	110203	110203
420.845	1065.76	109548	109548	109548	109548
421.345	1065.26	110050	110050	110050	110050
421.845	1064.76	110403	110403	110403	110403
422.345	1064.26	111245	111245	111245	111245
422.845	1063.76	111150	111150	111150	111150
423.345	1063.26	110948	110948	110948	110948
423.845	1062.76	111760	111760	111760	111760
424.345	1062.26	112268	112268	112268	112268
424.845	1061.76	113123	113123	113123	113123
425.345	1061.26	113698	113698	113698	113698
425.845	1060.76	113775	113775	113775	113775
426.345	1060.26	113685	113685	113685	113685
426.845	1059.76	113713	113713	113713	113713
427.345	1059.26	114578	114578	114578	114578
427.845	1058.76	114858	114858	114858	114858
428.345	1058.26	114880	114880	114880	114880
428.845	1057.76	115365	115365	115365	115365
429.345	1057.26	115910	115910	115910	115910
429.845	1056.76	113870	113870	113870	113870
430.345	1056.26	113065	113065	113065	113065
430.845	1055.76	114420	114420	114420	114420
431.345	1055.26	113503	113503	113503	113503
431.845	1054.76	113980	113980	113980	113980
432.345	1054.26	114735	114735	114735	114735
432.845	1053.76	113490	113490	113490	113490
433.345	1053.26	112760	112760	112760	112760
433.845	1052.76	112010	112010	112010	112010
434.345	1052.26	112103	112103	112103	112103
434.845	1051.76	111198	111198	111198	111198
435.345	1051.26	111028	111028	111028	111028
435.845	1050.76	109578	109578	109578	109578
436.345	1050.26	109575	109575	109575	109575
436.845	1049.76	108925	108925	108925	108925
437.345	1049.26	108388	108388	108388	108388
437.845	1048.76	108180	108180	108180	108180
438.345	1048.26	107445	107445	107445	107445
438.845	1047.76	108053	108053	108053	108053
439.345	1047.26	107818	107818	107818	107818
439.845	1046.76	107298	107298	107298	107298
440.345	1046.26	106778	106778	106778	106778
440.845	1045.76	106663	106663	106663	106663
441.345	1045.26	107110	107110	107110	107110
441.845	1044.76	106805	106805	106805	106805
442.345	1044.26	106450	106450	106450	106450
442.845	1043.76	107110	107110	107110	107110
443.345	1043.26	106530	106530	106530	106530
443.845	1042.76	107265	107265	107265	107265
444.345	1042.26	106710	106710	106710	106710
444.845	1041.76	107358	107358	107358	107358
445.345	1041.26	107370	107370	107370	107370
445.845	1040.76	107278	107278	107278	107278
446.345	1040.26	107213	107213	107213	107213
446.845	1039.76	106443	106443	106443	106443
447.345	1039.26	107445	107445	107445	107445
447.845	1038.76	107495	107495	107495	107495
448.345	1038.26	107370	107370	107370	107370
448.845	1037.76	107615	107615	107615	107615
449.345	1037.26	107595	107595	107595	107595
449.845	1036.76	107728	107728	107728	107728
450.345	1036.26	108255	108255	108255	108255
450.845	1035.76	109210	109210	109210	109210
451.345	1035.26	109033	109033	109033	109033
451.845	1034.76	108485	108485	108485	108485
452.345	1034.26	109000	109000	109000	109000
452.845	1033.76	108933	108933	108933	108933
453.345	1033.26	108720	108720	108720	108720
453.845	1032.76	108913	108913	108913	108913
454.345	1032.26	109025	109025	109025	109025
454.845	1031.76	109098	109098	109098	109098
455.345	1031.26	109240	109240	109240	109240
455.845	1030.76	108563	108563	108563	108563
456.345	1030.26	108765	108765	108765	108765
456.845	1029.76	109075	109075	109075	109075
457.345	1029.26	109303	109303	109303	109303
457.845	1028.76	109593	109593	109593	109593
458.345	1028.26	108550	108550	108550	108550
458.845	1027.76	108703	108703	108703	108703
459.345	1027.26	109778	109778	109778	109778
459.845	1026.76	109948	109948	109948	109948
460.345	1026.26	109845	109845	109845	109845
460.845	1025.76	110170	110170	110170	110170
461.345	1025.26	110750	110750	110750	110750
461.845	1024.76	111640	111640	111640	111640
462.345	1024.26	111645	111645	111645	111645
462.845	1023.76	112403	112403	112403	112403
463.345	1023.26	112210	112210	112210	112210
463.845	1022.76	112373	112373	112373	112373
464.345	1022.26	113493	113493	113493	113493
464.845	1021.76	114223	114223	114223	114223
465.345	1021.26	114428	114428	114428	114428
465.845	1020.76	116445	116445	116445	116445
466.345	1020.26	116075	116075	116075	116075
466.845	1019.76	115820	115820	115820	115820
467.345	1019.26	115728	115728	115728	115728
467.845	1018.76	116628	116628	116628	116628
468.345	1018.26	116078	116078	116078	116078
468.845	1017.76	116423	116423	116423	116423
469.345	1017.26	115213	115213	115213	115213
469.845	1016.76	114935	114935	114935	114935
470.345	1016.26	115333	115333	115333	115333
470.845	1015.76	115185	115185	115185	115185
471.345	1015.26	114785	114785	114785	114785
471.845	1014.76	114378	114378	114378	114378
472.345	1014.26	114610	114610	114610	114610
472.845	1013.76	114418	114418	114418	114418
473.345	1013.26	114710	114710	114710	114710
473.845	1012.76	115195	115195	115195	115195
474.345	1012.26	114683	114683	114683	114683
474.845	1011.76	114083	114083	114083	114083
475.345	1011.26	113900	113900	113900	113900
475.845	1010.76	113875	113875	113875	113875
476.345	1010.26	113720	113720	113720	113720
476.845	1009.76	114040	114040	114040	114040
477.345	1009.26	113468	113468	113468	113468
477.845	1008.76	114398	114398	114398	114398
478.345	1008.26	112945	112945	112945	112945
478.845	1007.76	113693	113693	113693	113693
479.345	1007.26	114170	114170	114170	114170
479.845	1006.76	112935	112935	112935	112935
480.345	1006.26	113115	113115	113115	113115
480.845	1005.76	112530	112530	112530	112530
481.345	1005.26	112583	112583	112583	112583
481.845	1004.76	112293	112293	112293	112293
482.345	1004.26	112205	112205	112205	112205
482.845	1003.76	112670	112670	112670	112670
483.345	1003.26	111918	111918	111918	111918
483.845	1002.76	111745	111745	111745	111745
484.345	1002.26	113093	113093	113093	113093
484.845	1001.76	112370	112370	112370	112370
485.345	1001.26	112065	112065	112065	112065
485.845	1000.76	113693	113693	113693	113693
486.345	1000.26	113115	113115	113115	113115
486.845	999.755	113863	113863	113863	113863
487.345	999.255	113353	113353	113353	113353
487.845	998.755	113400	113400	113400	113400
488.345	998.255	114080	114080	114080	114080
488.845	997.755	114988	114988	114988	114988
489.345	997.255	115908	115908	115908	115908
489.845	996.755	116333	116333	116333	116333
490.345	996.255	116550	116550	116550	116550
490.845	995.755	118385	118385	118385	118385
491.345	995.255	119415	119415	119415	119415
491.845	994.755	118818	118818	118818	118818
492.345	994.255	119238	119238	119238	119238
492.845	993.755	119453	119453	119453	119453
493.345	993.255	120385	120385	120385	120385
493.845	992.755	119355	119355	119355	119355
494.345	992.255	118345	118345	118345	118345
494.845	991.755	118268	118268	118268	118268
495.345	991.255	117298	117298	117298	117298
495.845	990.755	116425	116425	116425	116425
496.345	990.255	116145	116145	116145	116145
496.845	989.755	114878	114878	114878	114878
497.345	989.255	115443	115443	115443	115443
497.845	988.755	115815	115815	115815	115815
498.345	988.255	115145	115145	115145	115145
498.845	987.755	115550	115550	115550	115550
499.345	987.255	114800	114800	114800	114800
499.845	986.755	115850	115850	115850	115850
500.345	986.255	115220	115220	115220	115220
500.845	985.755	115298	115298	115298	115298
501.345	985.255	114863	114863	114863	114863
501.845	984.755	114443	114443	114443	114443
502.345	984.255	115298	115298	115298	115298
502.845	983.755	114670	114670	114670	114670
503.345	983.255	113825	113825	113825	113825
503.845	982.755	114278	114278	114278	114278
504.345	982.255	113760	113760	113760	113760
504.845	981.755	114208	114208	114208	114208
505.345	981.255	113935	113935	113935	113935
505.845	980.755	114718	114718	114718	114718
506.345	980.255	114948	114948	114948	114948
506.845	979.755	114898	114898	114898	114898
507.345	979.255	116145	116145	116145	116145
507.845	978.755	116150	116150	116150	116150
508.345	978.255	118503	118503	118503	118503
508.845	977.755	119848	119848	119848	119848
509.345	977.255	121843	121843	121843	121843
509.845	976.755	123598	123598	123598	123598
510.345	976.255	126070	126070	126070	126070
510.845	975.755	127795	127795	127795	127795
511.345	975.255	131060	131060	131060	131060
511.845	974.755	133033	133033	133033	133033
512.345	974.255	134600	134600	134600	134600
512.845	973.755	134720	134720	134720	134720
513.345	973.255	135108	135108	135108	135108
513.845	972.755	132768	132768	132768	132768
514.345	972.255	129975	129975	129975	129975
514.845	971.755	126813	126813	126813	126813
515.345	971.255	124055	124055	124055	124055
515.845	970.755	120975	120975	120975	120975
516.345	970.255	118565	118565	118565	118565
516.845	969.755	115950	115950	115950	115950
517.345	969.255	114608	114608	114608	114608
517.845	968.755	113205	113205	113205	113205
518.345	968.255	111510	111510	111510	111510
518.845	967.755	111388	111388	111388	111388
519.345	967.255	108210	108210	108210	108210
519.845	966.755	107353	107353	107353	107353
520.345	966.255	107673	107673	107673	107673
520.845	965.755	106923	106923	106923	106923
521.345	965.255	107115	107115	107115	107115
521.845	964.755	107893	107893	107893	107893
522.345	964.255	109895	109895	109895	109895
522.845	963.755	112798	112798	112798	112798
523.345	963.255	119298	119298	119298	119298
523.845	962.755	125703	125703	125703	125703
524.345	962.255	129650	129650	129650	129650
524.845	961.755	130528	130528	130528	130528
525.345	961.255	126060	126060	126060	126060
525.845	960.755	119640	119640	119640	119640
526.345	960.255	112180	112180	112180	112180
526.845	959.755	106993	106993	106993	106993
527.345	959.255	103240	103240	103240	103240
527.845	958.755	101485	101485	101485	101485
528.345	958.255	100793	100793	100793	100793
528.845	957.755	101203	101203	101203	101203
529.345	957.255	102955	102955	102955	102955
529.845	956.755	105283	105283	105283	105283
530.345	956.255	109433	109433	109433	109433
530.845	955.755	114353	114353	114353	114353
531.345	955.255	120545	120545	120545	120545
531.845	954.755	126713	126713	126713	126713
532.345	954.255	127828	127828	127828	127828
532.845	953.755	125988	125988	125988	125988
533.345	953.255	118773	118773	118773	118773
533.845	952.755	109838	109838	109838	109838
534.345	952.255	101415	101415	101415	101415
534.845	951.755	96510	96510	96510	96510
535.345	951.255	93282.5	93282.5	93282.5	93282.5
535.845	950.755	92417.5	92417.5	92417.5	92417.5
536.345	950.255	90870	90870	90870	90870
536.845	949.755	88970	88970	88970	88970
537.345	949.255	88885	88885	88885	88885
537.845	948.755	87575	87575	87575	87575
538.345	948.255	87202.5	87202.5	87202.5	87202.5
538.845	947.755	86672.5	86870.4	86870.4	86870.4
539.345	947.255	86747.5	86868.1	86868.1	86868.1
539.845	946.755	86727.5	86865.5	86865.5	86865.5
540.345	946.255	86985	86863.2	86863.2	86863.2
540.845	945.755	89700	86808.1	86808.1	86808.1
541.345	945.255	93642.5	86675.4	86675.4	86675.4
541.845	944.755	99017.5	86435.8	86435.8	86435.8
542.345	944.255	107370	86029.5	86029.5	86029.5
542.845	943.755	114555	85475.8	85475.8	85475.8
543.345	943.255	118028	84843.9	84843.9	84843.9
543.845	942.755	120473	84152.3	84152.3	84152.3
544.345	942.255	120445	83447.8	83447.8	83447.8
544.845	941.755	121995	82699.6	82699.6	82699.6
545.345	941.255	122378	81929.4	81929.4	81929.4
545.845	940.755	120105	81188.3	81188.3	81188.3
546.345	940.255	113195	80567.1	80567.1	80567.1
546.845	939.755	104508	80102.3	80102.3	80102.3
547.345	939.255	96647.5	79781.2	79781.2	79781.2
547.845	938.755	90290	79577.2	79577.2	79577.2
548.345	938.255	87895	79415.7	79415.7	79415.7
548.845	937.755	88427.5	79240.8	79240.8	79240.8
549.345	937.255	91820	78996.6	78996.6	78996.6
549.845	936.755	99502.5	78598.6	78598.6	78598.6
550.345	936.255	110350	77982.2	77982.2	77982.2
550.845	935.755	124733	77074.8	77074.8	77074.8
551.345	935.255	141043	75833.1	75833.1	75833.1
551.845	934.755	155435	74287.9	74287.9	74287.9
552.345	934.255	158895	72645.6	72645.6	72645.6
552.845	933.755	148590	71171.4	71171.4	71171.4
553.345	933.255	127853	70071.1	70071.1	70071.1
553.845	932.755	105993	69373.9	69373.9	69373.9
554.345	932.255	90462.5	68964.5	68964.5	68964.5
554.845	931.755	82110	68709.3	68709.3	68709.3
555.345	931.255	76932.5	68549.7	68549.7	68549.7
555.845	930.755	73735	68449.1	68449.1	68449.1
556.345	930.255	72037.5	68379.4	68379.4	68379.4
556.845	929.755	70277.5	68342.6	68342.6	68342.6
557.345	929.255	69422.5	68321.6	68321.6	68321.6
557.845	928.755	68830	68311.7	68311.7	68311.7
558.345	928.255	69072.5	68297	68297	68297
558.845	927.755	68582.5	68291.4	68291.4	68291.4
559.345	927.255	67947.5	68285	68285	68285
559.845	926.755	68325	68325	68325	68325
560.345	926.255	68595	68595	68595	68595
560.845	925.755	67637.5	67637.5	67637.5	67637.5
561.345	925.255	67910	67910	67910	67910
561.845	924.755	68517.5	68517.5	68517.5	68517.5
562.345	924.255	68890	68890	68890	68890
562.845	923.755	68342.5	68342.5	68342.5	68342.5
563.345	923.255	68622.5	68622.5	68622.5	68622.5
563.845	922.755	69565	69565	69565	69565
564.345	922.255	69580	69580	69580	69580
564.845	921.755	69055	69055	69055	69055
565.345	921.255	68955	68955	68955	68955
565.845	920.755	68680	68680	68680	68680
566.345	920.255	68420	68420	68420	68420
566.845	919.755	69462.5	69462.5	69462.5	69462.5
567.345	919.255	69272.5	69272.5	69272.5	69272.5
567.845	918.755	69150	69150	69150	69150
568.345	918.255	69390	69390	69390	69390
568.845	917.755	69882.5	69882.5	69882.5	69882.5
569.345	917.255	69600	69600	69600	69600
569.845	916.755	69457.5	69457.5	69457.5	69457.5
570.345	916.255	69025	69025	69025	69025
570.845	915.755	69157.5	69157.5	69157.5	69157.5
571.345	915.255	69945	69945	69945	69945
571.845	914.755	69485	69485	69485	69485
572.345	914.255	70072.5	70072.5	70072.5	70072.5
572.845	913.755	70152.5	70152.5	70152.5	70152.5
573.345	913.255	69912.5	69912.5	69912.5	69912.5
573.845	912.755	69902.5	69902.5	69902.5	69902.5
574.345	912.255	70547.5	70547.5	70547.5	70547.5
574.845	911.755	70162.5	70162.5	70162.5	70162.5
575.345	911.255	69630	69630	69630	69630
575.845	910.755	70010	70010	70010	70010
576.345	910.255	69992.5	69992.5	69992.5	69992.5
576.845	909.755	70032.5	70032.5	70032.5	70032.5
577.345	909.255	70910	70910	70910	70910
577.845	908.755	70980	70980	70980	70980
578.345	908.255	70495	70495	70495	70495
578.845	907.755	70727.5	70727.5	70727.5	70727.5
579.345	907.255	70677.5	70677.5	70677.5	70677.5
579.845	906.755	70325	70325	70325	70325
580.345	906.255	70602.5	70602.5	70602.5	70602.5
580.845	905.755	70855	70855	70855	70855
581.345	905.255	70590	70590	70590	70590
581.845	904.755	70997.5	70997.5	70997.5	70997.5
582.345	904.255	71165	71165	71165	71165
582.845	903.755	71700	71700	71700	71700
583.345	903.255	71430	71430	71430	71430
583.845	902.755	71885	71885	71885	71885
584.345	902.255	71887.5	71887.5	71887.5	71887.5
584.845	901.755	71195	71195	71195	71195
585.345	901.255	71040	71040	71040	71040
585.845	900.755	71545	71545	71545	71545
586.345	900.255	71895	71895	71895	71895
586.845	899.755	72037.5	72037.5	72037.5	72037.5
587.345	899.255	72407.5	72407.5	72407.5	72407.5
587.845	898.755	71512.5	71512.5	71512.5	71512.5
588.345	898.255	71962.5	71962.5	71962.5	71962.5
588.845	897.755	71380	71380	71380	71380
589.345	897.255	71482.5	71482.5	71482.5	71482.5
589.845	896.755	72050	72050	72050	72050
590.345	896.255	72157.5	72157.5	72157.5	72157.5
590.845	895.755	72210	72210	72210	72210
591.345	895.255	72265	72265	72265	72265
591.845	894.755	72097.5	72097.5	72097.5	72097.5
592.345	894.255	72647.5	72647.5	72647.5	72647.5
592.845	893.755	72820	72820	72820	72820
593.345	893.255	72635	72635	72635	72635
593.845	892.755	73000	73000	73000	73000
594.345	892.255	72472.5	72472.5	72472.5	72472.5
594.845	891.755	72382.5	72382.5	72382.5	72382.5
595.345	891.255	72902.5	72902.5	72902.5	72902.5
595.845	890.755	72632.5	72632.5	72632.5	72632.5
596.345	890.255	72465	72465	72465	72465
596.845	889.755	73370	73370	73370	73370
597.345	889.255	72517.5	72517.5	72517.5	72517.5
597.845	888.755	72740	72740	72740	72740
598.345	888.255	72437.5	72437.5	72437.5	72437.5
598.845	887.755	73832.5	73832.5	73832.5	73832.5
599.345	887.255	73122.5	73122.5	73122.5	73122.5
599.845	886.755	72997.5	72997.5	72997.5	72997.5
600.345	886.255	73525	73525	73525	73525
600.845	885.755	73745	73745	73745	73745
601.345	885.255	73797.5	73797.5	73797.5	73797.5
601.845	884.755	73345	73345	73345	73345
602.345	884.255	72682.5	72682.5	72682.5	72682.5
602.845	883.755	73305	73305	73305	73305
603.345	883.255	72925	72925	72925	72925
603.845	882.755	72770	72770	72770	72770
604.345	882.255	73217.5	73217.5	73217.5	73217.5
604.845	881.755	74132.5	74132.5	74132.5	74132.5
605.345	881.255	74220	74220	74220	74220
605.845	880.755	74062.5	74062.5	74062.5	74062.5
606.345	880.255	74785	74785	74785	74785
606.845	879.755	74075	74075	74075	74075
607.345	879.255	74097.5	74097.5	74097.5	74097.5
607.845	878.755	73960	73960	73960	73960
608.345	878.255	74575	74575	74575	74575
608.845	877.755	74822.5	74822.5	74822.5	74822.5
609.345	877.255	74695	74695	74695	74695
609.845	876.755	74432.5	74432.5	74432.5	74432.5
610.345	876.255	74720	74720	74720	74720
610.845	875.755	74177.5	74177.5	74177.5	74177.5
611.345	875.255	74440	74440	74440	74440
611.845	874.755	74392.5	74392.5	74392.5	74392.5
612.345	874.255	74817.5	74817.5	74817.5	74817.5
612.845	873.755	75360	75360	75360	75360
613.345	873.255	75582.5	75582.5	75582.5	75582.5
613.845	872.755	74930	74930	74930	74930
614.345	872.255	74977.5	74977.5	74977.5	74977.5
614.845	871.755	75485	75485	75485	75485
615.345	871.255	75020	75020	75020	75020
615.845	870.755	75560	75560	75560	75560
616.345	870.255	75555	75555	75555	75555
616.845	869.755	75257.5	75257.5	75257.5	75257.5
617.345	869.255	74900	74900	74900	74900
617.845	868.755	75617.5	75617.5	75617.5	75617.5
618.345	868.255	75480	75480	75480	75480
618.845	867.755	75365	75365	75365	75365
619.345	867.255	75537.5	75537.5	75537.5	75537.5
619.845	866.755	76345	76345	76345	76345
620.345	866.255	76045	76045	76045	76045
620.845	865.755	76297.5	76297.5	76297.5	76297.5
621.345	865.255	76470	76470	76470	76470
621.845	864.755	75642.5	75642.5	75642.5	75642.5
622.345	864.255	75977.5	75977.5	75977.5	75977.5
622.845	863.755	76637.5	76637.5	76637.5	76637.5
623.345	863.255	76337.5	76337.5	76337.5	76337.5
623.845	862.755	76207.5	76207.5	76207.5	76207.5
624.345	862.255	76667.5	76667.5	76667.5	76667.5
624.845	861.755	76787.5	76787.5	76787.5	76787.5
625.345	861.255	77010	77010	77010	77010
625.845	860.755	77172.5	77172.5	77172.5	77172.5
626.345	860.255	77575	77575	77575	77575
626.845	859.755	77347.5	77347.5	77347.5	77347.5
627.345	859.255	76800	76800	76800	76800
627.845	858.755	76382.5	76382.5	76382.5	76382.5
628.345	858.255	77622.5	77622.5	77622.5	77622.5
628.845	857.755	76995	76995	76995	76995
629.345	857.255	77125	77125	77125	77125
629.845	856.755	77017.5	77017.5	77017.5	77017.5
630.345	856.255	77800	77800	77800	77800
630.845	855.755	78002.5	78002.5	78002.5	78002.5
631.345	855.255	77525	77525	77525	77525
631.845	854.755	77697.5	77697.5	77697.5	77697.5
632.345	854.255	78070	78070	78070	78070
632.845	853.755	78217.5	78217.5	78217.5	78217.5
633.345	853.255	78117.5	78117.5	78117.5	78117.5
633.845	852.755	78250	78250	78250	78250
634.345	852.255	78305	78305	78305	78305
634.845	851.755	78030	78030	78030	78030
635.345	851.255	78737.5	78737.5	78737.5	78737.5
635.845	850.755	78652.5	78652.5	78652.5	78652.5
636.345	850.255	78690	78690	78690	78690
636.845	849.755	78232.5	78232.5	78232.5	78232.5
637.345	849.255	78767.5	78767.5	78767.5	78767.5
637.845	848.755	79087.5	79087.5	79087.5	79087.5
638.345	848.255	78580	78580	78580	78580
638.845	847.755	79480	79480	79480	79480
639.345	847.255	79407.5	79407.5	79407.5	79407.5
639.845	846.755	79305	79305	79305	79305
640.345	846.255	79340	79340	79340	79340
640.845	845.755	78852.5	78852.5	78852.5	78852.5
641.345	845.255	79775	79775	79775	79775
641.845	844.755	79132.5	79132.5	79132.5	79132.5
642.345	844.255	79355	79355	79355	79355
642.845	843.755	79682.5	79682.5	79682.5	79682.5
643.345	843.255	79827.5	79827.5	79827.5	79827.5
643.845	842.755	80012.5	80012.5	80012.5	80012.5
644.345	842.255	78807.5	78807.5	78807.5	78807.5
644.845	841.755	79937.5	79937.5	79937.5	79937.5
645.345	841.255	80205	80205	80205	80205
645.845	840.755	79465	79465	79465	79465
646.345	840.255	80807.5	80807.5	80807.5	80807.5
646.845	839.755	80945	80945	80945	80945
647.345	839.255	81317.5	81317.5	81317.5	81317.5
647.845	838.755	80602.5	80602.5	80602.5	80602.5
648.345	838.255	80425	80425	80425	80425
648.845	837.755	81085	81085	81085	81085
649.345	837.255	81157.5	81157.5	81157.5	81157.5
649.845	836.755	81357.5	81357.5	81357.5	81357.5
650.345	836.255	80977.5	80977.5	80977.5	80977.5
650.845	835.755	81147.5	81147.5	81147.5	81147.5
651.345	835.255	81602.5	81602.5	81602.5	81602.5
651.845	834.755	81330	81330	81330	81330
652.345	834.255	81375	81375	81375	81375
652.845	833.755	80905	80905	80905	80905
653.345	833.255	81450	81450	81450	81450
653.845	832.755	82245	82245	82245	82245
654.345	832.255	82357.5	82357.5	82357.5	82357.5
654.845	831.755	81865	81865	81865	81865
655.345	831.255	81912.5	81912.5	81912.5	81912.5
655.845	830.755	82127.5	82127.5	82127.5	82127.5
656.345	830.255	81877.5	81877.5	81877.5	81877.5
656.845	829.755	81737.5	81737.5	81737.5	81737.5
657.345	829.255	82450	82450	82450	82450
657.845	828.755	82230	82230	82230	82230
658.345	828.255	82095	82095	82095	82095
658.845	827.755	82195	82195	82195	82195
659.345	827.255	81842.5	81842.5	81842.5	81842.5
659.845	826.755	81170	81170	81170	81170
660.345	826.255	82685	82685	82685	82685
660.845	825.755	82532.5	82532.5	82532.5	82532.5
661.345	825.255	82840	82840	82840	82840
661.845	824.755	82947.5	82947.5	82947.5	82947.5
662.345	824.255	83327.5	83327.5	83327.5	83327.5
662.845	823.755	83427.5	83427.5	83427.5	83427.5
663.345	823.255	83687.5	83687.5	83687.5	83687.5
663.845	822.755	82945	82945	82945	82945
664.345	822.255	83725	83725	83725	83725
664.845	821.755	83970	83970	83970	83970
665.345	821.255	83710	83710	83710	83710
665.845	820.755	84047.5	84047.5	84047.5	84047.5
666.345	820.255	84347.5	84347.5	84347.5	84347.5
666.845	819.755	84255	84255	84255	84255
667.345	819.255	84480	84480	84480	84480
667.845	818.755	83992.5	83992.5	83992.5	83992.5
668.345	818.255	83897.5	83897.5	83897.5	83897.5
668.845	817.755	83937.5	83937.5	83937.5	83937.5
669.345	817.255	84965	84965	84965	84965
669.845	816.755	84992.5	84992.5	84992.5	84992.5
670.345	816.255	85812.5	85812.5	85812.5	85812.5
670.845	815.755	85205	85205	85205	85205
671.345	815.255	84920	84920	84920	84920
671.845	814.755	84965	84965	84965	84965
672.345	814.255	84885	84885	84885	84885
672.845	813.755	84197.5	84197.5	84197.5	84197.5
673.345	813.255	84810	84810	84810	84810
673.845	812.755	85705	85705	85705	85705
674.345	812.255	85927.5	85927.5	85927.5	85927.5
674.845	811.755	86032.5	86032.5	86032.5	86032.5
675.345	811.255	85667.5	85667.5	85667.5	85667.5
675.845	810.755	85780	85780	85780	85780
676.345	810.255	85617.5	85617.5	85617.5	85617.5
676.845	809.755	85710	85710	85710	85710
677.345	809.255	86022.5	86022.5	86022.5	86022.5
677.845	808.755	86542.5	86542.5	86542.5	86542.5
678.345	808.255	86142.5	86142.5	86142.5	86142.5
678.845	807.755	85695	85695	85695	85695
679.345	807.255	86075	86075	86075	86075
679.845	806.755	86432.5	86432.5	86432.5	86432.5
680.345	806.255	87007.5	87007.5	87007.5	87007.5
680.845	805.755	86765	86765	86765	86765
681.345	805.255	86317.5	86317.5	86317.5	86317.5
681.845	804.755	86880	86880	86880	86880
682.345	804.255	86742.5	86742.5	86742.5	86742.5
682.845	803.755	87147.5	87147.5	87147.5	87147.5
683.345	803.255	87387.5	87387.5	87387.5	87387.5
683.845	802.755	87065	87065	87065	87065
684.345	802.255	85980	85980	85980	85980
684.845	801.755	86915	86915	86915	86915
685.345	801.255	87440	87440	87440	87440
685.845	800.755	87200	87200	87200	87200
686.345	800.255	87260	87260	87260	87260
686.845	799.755	87277.5	87277.5	87277.5	87277.5
687.345	799.255	87637.5	87637.5	87637.5	87637.5
687.845	798.755	87405	87405	87405	87405
688.345	798.255	87765	87765	87765	87765
688.845	797.755	87717.5	87717.5	87717.5	87717.5
689.345	797.255	88062.5	88062.5	88062.5	88062.5
689.845	796.755	87920	87920	87920	87920
690.345	796.255	87047.5	87047.5	87047.5	87047.5
690.845	795.755	88245	88245	88245	88245
691.345	795.255	88170	88170	88170	88170
691.845	794.755	88865	88865	88865	88865
692.345	794.255	88490	88490	88490	88490
692.845	793.755	88705	88705	88705	88705
693.345	793.255	88865	88865	88865	88865
693.845	792.755	88915	88915	88915	88915
694.345	792.255	89395	89395	89395	89395
694.845	791.755	90050	90050	90050	90050
695.345	791.255	89385	89385	89385	89385
695.845	790.755	89822.5	89822.5	89822.5	89822.5
696.345	790.255	89120	89120	89120	89120
696.845	789.755	90055	90055	90055	90055
697.345	789.255	89582.5	89582.5	89582.5	89582.5
697.845	788.755	89560	89560	89560	89560
698.345	788.255	90422.5	90422.5	90422.5	90422.5
698.845	787.755	89785	89785	89785	89785
699.345	787.255	90300	90300	90300	90300
699.845	786.755	89050	89050	89050	89050
700.345	786.255	89932.5	89932.5	89932.5	89932.5
700.845	785.755	89960	89960	89960	89960
701.345	785.255	89677.5	89677.5	89677.5	89677.5
701.845	784.755	90157.5	90157.5	90157.5	90157.5
702.345	784.255	90722.5	90722.5	90722.5	90722.5
702.845	783.755	90585	90585	90585	90585
703.345	783.255	91330	91330	91330	91330
703.845	782.755	91890	91890	91890	91890
704.345	782.255	91937.5	91937.5	91937.5	91937.5
704.845	781.755	91742.5	91742.5	91742.5	91742.5
705.345	781.255	92477.5	92477.5	92477.5	92477.5
705.845	780.755	92435	92435	92435	92435
706.345	780.255	92250	92250	92250	92250
706.845	779.755	92397.5	92397.5	92397.5	92397.5
707.345	779.255	92620	92620	92620	92620
707.845	778.755	92617.5	92617.5	92617.5	92617.5
708.345	778.255	92162.5	92162.5	92162.5	92162.5
708.845	777.755	92015	92015	92015	92015
709.345	777.255	91515	91515	91515	91515
709.845	776.755	92442.5	92442.5	92442.5	92442.5
710.345	776.255	93865	93865	93865	93865
710.845	775.755	93627.5	93627.5	93627.5	93627.5
711.345	775.255	93112.5	93112.5	93112.5	93112.5
711.845	774.755	93052.5	93052.5	93052.5	93052.5
712.345	774.255	92927.5	92927.5	92927.5	92927.5
712.845	773.755	92917.5	92917.5	92917.5	92917.5
713.345	773.255	92940	92940	92940	92940
713.845	772.755	94175	94175	94175	94175
714.345	772.255	93867.5	93867.5	93867.5	93867.5
714.845	771.755	94547.5	94547.5	94547.5	94547.5
715.345	771.255	93772.5	93772.5	93772.5	93772.5
715.845	770.755	94067.5	94067.5	94067.5	94067.5
716.345	770.255	94355	94355	94355	94355
716.845	769.755	94937.5	94937.5	94937.5	94937.5
717.345	769.255	94770	94770	94770	94770
717.845	768.755	94587.5	94587.5	94587.5	94587.5
718.345	768.255	94412.5	94412.5	94412.5	94412.5
718.845	767.755	94615	94615	94615	94615
719.345	767.255	94065	94065	94065	94065
719.845	766.755	94095	94095	94095	94095
720.345	766.255	93642.5	93642.5	93642.5	93642.5
720.845	765.755	94537.5	94537.5	94537.5	94537.5
721.345	765.255	94255	94255	94255	94255
721.845	764.755	94775	94775	94775	94775
722.345	764.255	94295	94295	94295	94295
722.845	763.755	95165	95165	95165	95165
723.345	763.255	95495	95495	95495	95495
723.845	762.755	95045	95045	95045	95045
724.345	762.255	95350	95350	95350	95350
724.845	761.755	94697.5	94697.5	94697.5	94697.5
725.345	761.255	95362.5	95362.5	95362.5	95362.5
725.845	760.755	96075	96075	96075	96075
726.345	760.255	95010	95010	95010	95010
726.845	759.755	95565	95565	95565	95565
727.345	759.255	95720	95720	95720	95720
727.845	758.755	95787.5	95787.5	95787.5	95787.5
728.345	758.255	96290	96290	96290	96290
728.845	757.755	96965	96965	96965	96965
729.345	757.255	96912.5	96912.5	96912.5	96912.5
729.845	756.755	96750	96750	96750	96750
730.345	756.255	96422.5	96422.5	96422.5	96422.5
730.845	755.755	96320	96320	96320	96320
731.345	755.255	96502.5	96502.5	96502.5	96502.5
731.845	754.755	95667.5	95667.5	95667.5	95667.5
732.345	754.255	95805	95805	95805	95805
732.845	753.755	96137.5	96137.5	96137.5	96137.5
733.345	753.255	94845	94845	94845	94845
733.845	752.755	95385	95385	95385	95385
734.345	752.255	94885	94885	94885	94885
734.845	751.755	95287.5	95287.5	95287.5	95287.5
735.345	751.255	95415	95415	95415	95415
735.845	750.755	95735	95735	95735	95735
736.345	750.255	95837.5	95837.5	95837.5	95837.5
736.845	749.755	95912.5	95912.5	95912.5	95912.5
737.345	749.255	95052.5	95052.5	95052.5	95052.5
737.845	748.755	95655	95655	95655	95655
738.345	748.255	95750	95750	95750	95750
738.845	747.755	96370	96370	96370	96370
739.345	747.255	96767.5	96767.5	96767.5	96767.5
739.845	746.755	96155	96155	96155	96155
740.345	746.255	96362.5	96362.5	96362.5	96362.5
740.845	745.755	95915	95915	95915	95915
741.345	745.255	95885	95885	95885	95885
741.845	744.755	96325	96325	96325	96325
742.345	744.255	96435	96435	96435	96435
742.845	743.755	95810	95810	95810	95810
743.345	743.255	96207.5	96207.5	96207.5	96207.5
743.845	742.755	96500	96500	96500	96500
744.345	742.255	97062.5	97062.5	97062.5	97062.5
744.845	741.755	97567.5	97567.5	97567.5	97567.5
745.345	741.255	97295	97295	97295	97295
745.845	740.755	96860	96860	96860	96860
746.345	740.255	96487.5	96487.5	96487.5	96487.5
746.845	739.755	96665	96665	96665	96665
747.345	739.255	98627.5	98627.5	98627.5	98627.5
747.845	738.755	97610	97610	97610	97610
748.345	738.255	97657.5	97657.5	97657.5	97657.5
748.845	737.755	97927.5	97927.5	97927.5	97927.5
749.345	737.255	98040	98040	98040	98040
749.845	736.755	97880	97880	97880	97880
750.345	736.255	98750	98750	98750	98750
750.845	735.755	98622.5	98622.5	98622.5	98622.5
751.345	735.255	99337.5	99337.5	99337.5	99337.5
751.845	734.755	99622.5	99622.5	99622.5	99622.5
752.345	734.255	99477.5	99477.5	99477.5	99477.5
752.845	733.755	99375	99375	99375	99375
753.345	733.255	99070	99070	99070	99070
753.845	732.755	99660	99660	99660	99660
754.345	732.255	99710	99710	99710	99710
754.845	731.755	99752.5	99752.5	99752.5	99752.5
755.345	731.255	100475	100475	100475	100475
755.845	730.755	100463	100463	100463	100463
756.345	730.255	99567.5	99567.5	99567.5	99567.5
756.845	729.755	99620	99620	99620	99620
757.345	729.255	99627.5	99627.5	99627.5	99627.5
757.845	728.755	101200	101200	101200	101200
758.345	728.255	100380	100380	100380	100380
758.845	727.755	100155	100155	100155	100155
759.345	727.255	100473	100473	100473	100473
759.845	726.755	101265	101265	101265	101265
760.345	726.255	101263	101263	101263	101263
760.845	725.755	101905	101905	101905	101905
761.345	725.255	102433	102433	102433	102433
761.845	724.755	102533	102533	102533	102533
762.345	724.255	102053	102053	102053	102053
762.845	723.755	102730	102730	102730	102730
763.345	723.255	102920	102920	102920	102920
763.845	722.755	103248	103248	103248	103248
764.345	722.255	103965	103965	103965	103965
764.845	721.755	103768	103768	103768	103768
765.345	721.255	103863	103863	103863	103863
765.845	720.755	103665	103665	103665	103665
766.345	720.255	104333	104333	104333	104333
766.845	719.755	104490	104490	104490	104490
767.345	719.255	104550	104550	104550	104550
767.845	718.755	104450	104450	104450	104450
768.345	718.255	104005	104005	104005	104005
768.845	717.755	103115	103115	103115	103115
769.345	717.255	102805	102805	102805	102805
769.845	716.755	102998	102998	102998	102998
770.345	716.255	102408	102408	102408	102408
770.845	715.755	101730	101730	101730	101730
771.345	715.255	101898	101898	101898	101898
771.845	714.755	101485	101485	101485	101485
772.345	714.255	101170	101170	101170	101170
772.845	713.755	101130	101130	101130	101130
773.345	713.255	101063	101063	101063	101063
773.845	712.755	100970	100970	100970	100970
774.345	712.255	101530	101530	101530	101530
774.845	711.755	100243	100243	100243	100243
775.345	711.255	99010	99010	99010	99010
775.845	710.755	97735	97735	97735	97735
776.345	710.255	97415	97415	97415	97415
776.845	709.755	96290	96290	96290	96290
777.345	709.255	95142.5	95142.5	95142.5	95142.5
777.845	708.755	94517.5	94517.5	94517.5	94517.5
778.345	708.255	93927.5	93927.5	93927.5	93927.5
778.845	707.755	93492.5	93492.5	93492.5	93492.5
779.345	707.255	93542.5	93542.5	93542.5	93542.5
779.845	706.755	93257.5	93257.5	93257.5	93257.5
780.345	706.255	92905	92905	92905	92905
780.845	705.755	93190	93190	93190	93190
781.345	705.255	92270	92270	92270	92270
781.845	704.755	92522.5	92522.5	92522.5	92522.5
782.345	704.255	93200	93200	93200	93200
782.845	703.755	92557.5	92557.5	92557.5	92557.5
783.345	703.255	92900	92900	92900	92900
783.845	702.755	93007.5	93007.5	93007.5	93007.5
784.345	702.255	93630	93630	93630	93630
784.845	701.755	93997.5	93997.5	93997.5	93997.5
785.345	701.255	93012.5	93012.5	93012.5	93012.5
785.845	700.755	93460	93460	93460	93460
786.345	700.255	93197.5	93197.5	93197.5	93197.5
786.845	699.755	92552.5	92552.5	92552.5	92552.5
787.345	699.255	92785	92785	92785	92785
787.845	698.755	92967.5	92967.5	92967.5	92967.5
788.345	698.255	93125	93125	93125	93125
788.845	697.755	92050	92050	92050	92050
789.345	697.255	92532.5	92532.5	92532.5	92532.5
789.845	696.755	92700	92700	92700	92700
790.345	696.255	92105	92105	92105	92105
790.845	695.755	92807.5	92807.5	92807.5	92807.5
791.345	695.255	92082.5	92082.5	92082.5	92082.5
791.845	694.755	92337.5	92337.5	92337.5	92337.5
792.345	694.255	92205	92205	92205	92205
792.845	693.755	91620	91620	91620	91620
793.345	693.255	91760	91760	91760	91760
793.845	692.755	91425	91425	91425	91425
794.345	692.255	91642.5	91642.5	91642.5	91642.5
794.845	691.755	91760	91760	91760	91760
795.345	691.255	91732.5	91732.5	91732.5	91732.5
795.845	690.755	91322.5	91322.5	91322.5	91322.5
796.345	690.255	92202.5	92202.5	92202.5	92202.5
796.845	689.755	91997.5	91997.5	91997.5	91997.5
797.345	689.255	92425	92425	92425	92425
797.845	688.755	91605	91605	91605	91605
798.345	688.255	90612.5	90612.5	90612.5	90612.5
798.845	687.755	90295	90295	90295	90295
799.345	687.255	90892.5	90892.5	90892.5	90892.5
799.845	686.755	90792.5	90792.5	90792.5	90792.5
800.345	686.255	89937.5	89937.5	89937.5	89937.5
800.845	685.755	90222.5	90222.5	90222.5	90222.5
801.345	685.255	90397.5	90397.5	90397.5	90397.5
801.845	684.755	90767.5	90767.5	90767.5	90767.5
802.345	684.255	90280	90280	90280	90280
802.845	683.755	91160	91160	91160	91160
803.345	683.255	90180	90180	90180	90180
803.845	682.755	89937.5	89937.5	89937.5	89937.5
804.345	682.255	90415	90415	90415	90415
804.845	681.755	90445	90445	90445	90445
805.345	681.255	90447.5	90447.5	90447.5	90447.5
805.845	680.755	90855	90855	90855	90855
806.345	680.255	90895	90895	90895	90895
806.845	679.755	90357.5	90357.5	90357.5	90357.5
807.345	679.255	90422.5	90422.5	90422.5	90422.5
807.845	678.755	90810	90810	90810	90810
808.345	678.255	91392.5	91392.5	91392.5	91392.5
808.845	677.755	92265	92265	92265	92265
809.345	677.255	91712.5	91712.5	91712.5	91712.5
809.845	676.755	91807.5	91807.5	91807.5	91807.5
810.345	676.255	92450	92450	92450	92450
810.845	675.755	92522.5	92522.5	92522.5	92522.5
811.345	675.255	91767.5	91767.5	91767.5	91767.5
811.845	674.755	92717.5	92717.5	92717.5	92717.5
812.345	674.255	92080	92080	92080	92080
812.845	673.755	92100	92100	92100	92100
813.345	673.255	93242.5	93242.5	93242.5	93242.5
813.845	672.755	92690	92690	92690	92690
814.345	672.255	92485	92485	92485	92485
814.845	671.755	93232.5	93232.5	93232.5	93232.5
815.345	671.255	93575	93575	93575	93575
815.845	670.755	94255	94255	94255	94255
816.345	670.255	93910	93910	93910	93910
816.845	669.755	94042.5	94042.5	94042.5	94042.5
817.345	669.255	94022.5	94022.5	94022.5	94022.5
817.845	668.755	93912.5	93912.5	93912.5	93912.5
818.345	668.255	93687.5	93687.5	93687.5	93687.5
818.845	667.755	93675	93675	93675	93675
819.345	667.255	93607.5	93607.5	93607.5	93607.5
819.845	666.755	94022.5	94022.5	94022.5	94022.5
820.345	666.255	94275	94275	94275	94275
820.845	665.755	94580	94580	94580	94580
821.345	665.255	94212.5	94212.5	94212.5	94212.5
821.845	664.755	94702.5	94702.5	94702.5	94702.5
822.345	664.255	95045	95045	95045	95045
822.845	663.755	94672.5	94672.5	94672.5	94672.5
823.345	663.255	95715	95715	95715	95715
823.845	662.755	95642.5	95642.5	95642.5	95642.5
824.345	662.255	96000	96000	96000	96000
824.845	661.755	96327.5	96327.5	96327.5	96327.5
825.345	661.255	97150	97150	97150	97150
825.845	660.755	98020	98020	98020	98020
826.345	660.255	98592.5	98592.5	98592.5	98592.5
826.845	659.755	98297.5	98297.5	98297.5	98297.5
827.345	659.255	99062.5	99062.5	99062.5	99062.5
827.845	658.755	99142.5	99142.5	99142.5	99142.5
828.345	658.255	98722.5	98722.5	98722.5	98722.5
828.845	657.755	98317.5	98317.5	98317.5	98317.5
829.345	657.255	98562.5	98562.5	98562.5	98562.5
829.845	656.755	98920	98920	98920	98920
830.345	656.255	99925	99925	99925	99925
830.845	655.755	99307.5	99307.5	99307.5	99307.5
831.345	655.255	99260	99260	99260	99260
831.845	654.755	99912.5	99912.5	99912.5	99912.5
832.345	654.255	99367.5	99367.5	99367.5	99367.5
832.845	653.755	99315	99315	99315	99315
833.345	653.255	99980	99980	99980	99980
833.845	652.755	100698	100698	100698	100698
834.345	652.255	101643	101643	101643	101643
834.845	651.755	102863	102863	102863	102863
835.345	651.255	104350	104350	104350	104350
835.845	650.755	105483	105483	105483	105483
836.345	650.255	106905	106905	106905	106905
836.845	649.755	108233	108233	108233	108233
837.345	649.255	109405	109405	109405	109405
837.845	648.755	109090	109090	109090	109090
838.345	648.255	108448	108448	108448	108448
838.845	647.755	106118	106118	106118	106118
839.345	647.255	105155	105155	105155	105155
839.845	646.755	102710	102710	102710	102710
840.345	646.255	100435	100435	100435	100435
840.845	645.755	98922.5	98922.5	98922.5	98922.5
841.345	645.255	98175	98175	98175	98175
841.845	644.755	97520	97520	97520	97520
842.345	644.255	96065	96065	96065	96065
842.845	643.755	95915	95915	95915	95915
843.345	643.255	96650	96650	96650	96650
843.845	642.755	97175	97175	97175	97175
844.345	642.255	97772.5	97772.5	97772.5	97772.5
844.845	641.755	98042.5	98042.5	98042.5	98042.5
845.345	641.255	97795	97795	97795	97795
845.845	640.755	97377.5	97377.5	97377.5	97377.5
846.345	640.255	97147.5	97147.5	97147.5	97147.5
846.845	639.755	96582.5	96582.5	96582.5	96582.5
847.345	639.255	94340	94340	94340	94340
847.845	638.755	92625	92625	92625	92625
848.345	638.255	91475	91475	91475	91475
848.845	637.755	90072.5	90072.5	90072.5	90072.5
849.345	637.255	89840	89840	89840	89840
849.845	636.755	89387.5	89387.5	89387.5	89387.5
850.345	636.255	89327.5	89327.5	89327.5	89327.5
850.845	635.755	88155	88155	88155	88155
851.345	635.255	88070	88070	88070	88070
851.845	634.755	88087.5	88087.5	88087.5	88087.5
852.345	634.255	88612.5	88612.5	88612.5	88612.5
852.845	633.755	89172.5	89172.5	89172.5	89172.5
853.345	633.255	89170	89170	89170	89170
853.845	632.755	89632.5	89632.5	89632.5	89632.5
854.345	632.255	91890	91890	91890	91890
854.845	631.755	91137.5	91137.5	91137.5	91137.5
855.345	631.255	92610	92610	92610	92610
855.845	630.755	93417.5	93417.5	93417.5	93417.5
856.345	630.255	93390	93390	93390	93390
856.845	629.755	92037.5	92037.5	92037.5	92037.5
857.345	629.255	91940	91940	91940	91940
857.845	628.755	90360	90360	90360	90360
858.345	628.255	88367.5	88367.5	88367.5	88367.5
858.845	627.755	86460	86460	86460	86460
859.345	627.255	84937.5	84937.5	84937.5	84937.5
859.845	626.755	82902.5	82902.5	82902.5	82902.5
860.345	626.255	81300	81300	81300	81300
860.845	625.755	80300	80300	80300	80300
861.345	625.255	79602.5	79602.5	79602.5	79602.5
861.845	624.755	79167.5	79167.5	79167.5	79167.5
862.345	624.255	78625	78625	78625	78625
862.845	623.755	77882.5	77882.5	77882.5	77882.5
863.345	623.255	77495	77495	77495	77495
863.845	622.755	77720	77720	77720	77720
864.345	622.255	77482.5	77482.5	77482.5	77482.5
864.845	621.755	76707.5	76707.5	76707.5	76707.5
865.345	621.255	76702.5	76702.5	76702.5	76702.5
865.845	620.755	76862.5	76862.5	76862.5	76862.5
866.345	620.255	75917.5	75917.5	75917.5	75917.5
866.845	619.755	75437.5	75437.5	75437.5	75437.5
867.345	619.255	75165	75165	75165	75165
867.845	618.755	74717.5	74717.5	74717.5	74717.5
868.345	618.255	74735	74735	74735	74735
868.845	617.755	74540	74540	74540	74540
869.345	617.255	74537.5	74537.5	74537.5	74537.5
869.845	616.755	75415	75415	75415	75415
870.345	616.255	74557.5	74557.5	74557.5	74557.5
870.845	615.755	74435	74435	74435	74435
871.345	615.255	74485	74485	74485	74485
871.845	614.755	75375	75375	75375	75375
872.345	614.255	74820	74820	74820	74820
872.845	613.755	74110	74110	74110	74110
873.345	613.255	73610	73610	73610	73610
873.845	612.755	73860	73860	73860	73860
874.345	612.255	74482.5	74482.5	74482.5	74482.5
874.845	611.755	74017.5	74017.5	74017.5	74017.5
875.345	611.255	73505	73505	73505	73505
875.845	610.755	73695	73695	73695	73695
876.345	610.255	74720	74720	74720	74720
876.845	609.755	75132.5	75132.5	75132.5	75132.5
877.345	609.255	74947.5	74947.5	74947.5	74947.5
877.845	608.755	74547.5	74547.5	74547.5	74547.5
878.345	608.255	73812.5	73812.5	73812.5	73812.5
878.845	607.755	73972.5	73972.5	73972.5	73972.5
879.345	607.255	74547.5	74547.5	74547.5	74547.5
879.845	606.755	74205	74205	74205	74205
880.345	606.255	74755	74755	74755	74755
880.845	605.755	74482.5	74482.5	74482.5	74482.5
881.345	605.255	74447.5	74447.5	74447.5	74447.5
881.845	604.755	75140	75140	75140	75140
882.345	604.255	76147.5	76147.5	76147.5	76147.5
882.845	603.755	75627.5	75627.5	75627.5	75627.5
883.345	603.255	76062.5	76062.5	76062.5	76062.5
883.845	602.755	76027.5	76027.5	76027.5	76027.5
884.345	602.255	75860	75860	75860	75860
884.845	601.755	75857.5	75857.5	75857.5	75857.5
885.345	601.255	75905	75905	75905	75905
885.845	600.755	75567.5	75567.5	75567.5	75567.5
886.345	600.255	76655	76655	76655	76655
886.845	599.755	76567.5	76567.5	76567.5	76567.5
887.345	599.255	76852.5	76852.5	76852.5	76852.5
887.845	598.755	76557.5	76557.5	76557.5	76557.5
888.345	598.255	77232.5	77232.5	77232.5	77232.5
888.845	597.755	76960	76960	76960	76960
889.345	597.255	77660	77660	77660	77660
889.845	596.755	77675	77675	77675	77675
890.345	596.255	77502.5	77502.5	77502.5	77502.5
890.845	595.755	78155	78155	78155	78155
891.345	595.255	77960	77960	77960	77960
891.845	594.755	78112.5	78112.5	78112.5	78112.5
892.345	594.255	79157.5	79157.5	79157.5	79157.5
892.845	593.755	78877.5	78877.5	78877.5	78877.5
893.345	593.255	78342.5	78342.5	78342.5	78342.5
893.845	592.755	78295	78295	78295	78295
894.345	592.255	78692.5	78692.5	78692.5	78692.5
894.845	591.755	78630	78630	78630	78630
895.345	591.255	79165	79165	79165	79165
895.845	590.755	79285	79285	79285	79285
896.345	590.255	78677.5	78677.5	78677.5	78677.5
896.845	589.755	78627.5	78627.5	78627.5	78627.5
897.345	589.255	78685	78685	78685	78685
897.845	588.755	78887.5	78887.5	78887.5	78887.5
898.345	588.255	79297.5	79297.5	79297.5	79297.5
898.845	587.755	79335	79335	79335	79335
899.345	587.255	79637.5	79637.5	79637.5	79637.5
899.845	586.755	80050	80050	80050	80050
900.345	586.255	79365	79365	79365	79365
900.845	585.755	79842.5	79842.5	79842.5	79842.5
901.345	585.255	80742.5	80742.5	80742.5	80742.5
901.845	584.755	80502.5	80502.5	80502.5	80502.5
902.345	584.255	80320	80320	80320	80320
902.845	583.755	80375	80375	80375	80375
903.345	583.255	80122.5	80122.5	80122.5	80122.5
903.845	582.755	81237.5	81237.5	81237.5	81237.5
904.345	582.255	80767.5	80767.5	80767.5	80767.5
904.845	581.755	81517.5	81517.5	81517.5	81517.5
905.345	581.255	81977.5	81977.5	81977.5	81977.5
905.845	580.755	82667.5	82667.5	82667.5	82667.5
906.345	580.255	83062.5	83062.5	83062.5	83062.5
906.845	579.755	83152.5	83152.5	83152.5	83152.5
907.345	579.255	84390	84390	84390	84390
907.845	578.755	84537.5	84537.5	84537.5	84537.5
908.345	578.255	85752.5	85752.5	85752.5	85752.5
908.845	577.755	86487.5	86487.5	86487.5	86487.5
909.345	577.255	87467.5	87467.5	87467.5	87467.5
909.845	576.755	88582.5	88582.5	88582.5	88582.5
910.345	576.255	90220	90220	90220	90220
910.845	575.755	92905	92905	92905	92905
911.345	575.255	93732.5	93732.5	93732.5	93732.5
911.845	574.755	93432.5	93432.5	93432.5	93432.5
912.345	574.255	94650	94650	94650	94650
912.845	573.755	94777.5	94777.5	94777.5	94777.5
913.345	573.255	95010	95010	95010	95010
913.845	572.755	94710	94710	94710	94710
914.345	572.255	95205	95205	95205	95205
914.845	571.755	95575	95575	95575	95575
915.345	571.255	96475	96475	96475	96475
915.845	570.755	99952.5	99952.5	99952.5	99952.5
916.345	570.255	105658	105658	105658	105658
916.845	569.755	110185	110185	110185	110185
917.345	569.255	112850	112850	112850	112850
917.845	568.755	110948	110948	110948	110948
918.345	568.255	105225	105225	105225	105225
918.845	567.755	98665	98665	98665	98665
919.345	567.255	91595	91595	91595	91595
919.845	566.755	87262.5	87262.5	87262.5	87262.5
920.345	566.255	83385	83385	83385	83385
920.845	565.755	80910	80910	80910	80910
921.345	565.255	77782.5	77782.5	77782.5	77782.5
921.845	564.755	75775	75775	75775	75775
922.345	564.255	73790	73790	73790	73790
922.845	563.755	72260	72260	72260	72260
923.345	563.255	72365	72365	72365	72365
923.845	562.755	71817.5	71817.5	71817.5	71817.5
924.345	562.255	70347.5	70347.5	70347.5	70347.5
924.845	561.755	69697.5	69697.5	69697.5	69697.5
925.345	561.255	68872.5	68872.5	68872.5	68872.5
925.845	560.755	68197.5	68197.5	68197.5	68197.5
926.345	560.255	66320	66320	66320	66320
926.845	559.755	64965	64965	64965	64965
927.345	559.255	63520	63520	63520	63520
927.845	558.755	63052.5	63052.5	63052.5	63052.5
928.345	558.255	62702.5	62702.5	62702.5	62702.5
928.845	557.755	62795	62795	62795	62795
929.345	557.255	62517.5	62517.5	62517.5	62517.5
929.845	556.755	63875	63875	63875	63875
930.345	556.255	64632.5	64632.5	64632.5	64632.5
930.845	555.755	65070	65070	65070	65070
931.345	555.255	65792.5	65792.5	65792.5	65792.5
931.845	554.755	66237.5	66237.5	66237.5	66237.5
932.345	554.255	66327.5	66327.5	66327.5	66327.5
932.845	553.755	66110	66110	66110	66110
933.345	553.255	65292.5	65292.5	65292.5	65292.5
933.845	552.755	63797.5	63797.5	63797.5	63797.5
934.345	552.255	63380	63380	63380	63380
934.845	551.755	63455	63455	63455	63455
935.345	551.255	64550	64550	64550	64550
935.845	550.755	65795	65795	65795	65795
936.345	550.255	67107.5	67107.5	67107.5	67107.5
936.845	549.755	67845	67845	67845	67845
937.345	549.255	68505	68505	68505	68505
937.845	548.755	66722.5	66722.5	66722.5	66722.5
938.345	548.255	64560	64560	64560	64560
938.845	547.755	61765	61765	61765	61765
939.345	547.255	60017.5	60017.5	60017.5	60017.5
939.845	546.755	59277.5	59277.5	59277.5	59277.5
940.345	546.255	59502.5	59502.5	59502.5	59502.5
940.845	545.755	58682.5	58682.5	58682.5	58682.5
941.345	545.255	58277.5	58277.5	58277.5	58277.5
941.845	544.755	57762.5	57762.5	57762.5	57762.5
942.345	544.255	58290	58290	58290	58290
942.845	543.755	57830	57830	57830	57830
943.345	543.255	57300	57300	57300	57300
943.845	542.755	57340	57340	57340	57340
944.345	542.255	57437.5	57437.5	57437.5	57437.5
944.845	541.755	57092.5	57092.5	57092.5	57092.5
945.345	541.255	56737.5	56737.5	56737.5	56737.5
945.845	540.755	55365	55365	55365	55365
946.345	540.255	53632.5	53632.5	53632.5	53632.5
946.845	539.755	51315	51315	51315	51315
947.345	539.255	50475	50475	50475	50475
947.845	538.755	49072.5	49072.5	49072.5	49072.5
948.345	538.255	48042.5	48042.5	48042.5	48042.5
948.845	537.755	47620	47620	47620	47620
949.345	537.255	47325	47325	47325	47325
949.845	536.755	47090	47090	47090	47090
950.345	536.255	46960	46960	46960	46960
950.845	535.755	46295	46295	46295	46295
951.345	535.255	46320	46320	46320	46320
951.845	534.755	46247.5	46247.5	46247.5	46247.5
952.345	534.255	45937.5	45937.5	45937.5	45937.5
952.845	533.755	45827.5	45827.5	45827.5	45827.5
953.345	533.255	47445	47445	47445	47445
953.845	532.755	50245	50245	50245	50245
954.345	532.255	56495	56495	56495	56495
954.845	531.755	72437.5	72437.5	72437.5	72437.5
955.345	531.255	110995	110995	110995	110995
955.845	530.755	163268	163268	163268	163268
956.345	530.255	189888	189888	189888	189888
956.845	529.755	173963	173963	173963	173963
957.345	529.255	124125	124125	124125	124125
957.845	528.755	69747.5	69747.5	69747.5	69747.5
958.345	528.255	42272.5	42272.5	42272.5	42272.5
958.845	527.755	34167.5	34167.5	34167.5	34167.5
959.345	527.255	32575	32575	32575	32575
959.845	526.755	32670	32670	32670	32670
960.345	526.255	35055	35055	35055	35055
960.845	525.755	40245	40245	40245	40245
961.345	525.255	45552.5	45552.5	45552.5	45552.5
961.845	524.755	50672.5	50672.5	50672.5	50672.5
962.345	524.255	52280	52280	52280	52280
962.845	523.755	49522.5	49522.5	49522.5	49522.5
963.345	523.255	44610	44610	44610	44610
963.845	522.755	38617.5	38617.5	38617.5	38617.5
964.345	522.255	33662.5	33662.5	33662.5	33662.5
964.845	521.755	30880	30880	30880	30880
965.345	521.255	28777.5	28777.5	28777.5	28777.5
965.845	520.755	27037.5	27037.5	27037.5	27037.5
966.345	520.255	27485	27485	27485	27485
966.845	519.755	27385	27714.8	27714.8	27714.8
967.345	519.255	28317.5	27687.2	27687.2	27687.2
967.845	518.755	32347.5	27474.4	27474.4	27474.4
968.345	518.255	44642.5	26690.2	26690.2	26690.2
968.845	517.755	70197.5	24703.1	24703.1	24703.1
969.345	517.255	96212.5	21437	21437	21437
969.845	516.755	99927.5	17852	17852	17852
970.345	516.255	81400	14949.5	14949.5	14949.5
970.845	515.755	50692.5	13317	13317	13317
971.345	515.255	26297.5	12724.1	12724.1	12724.1
971.845	514.755	16595	12547.3	12547.3	12547.3
972.345	514.255	14415	12462	12462	12462
972.845	513.755	13352.5	12421.4	12421.4	12421.4
973.345	513.255	12840	12402.2	12402.2	12402.2
973.845	512.755	12770	12385.4	12385.4	12385.4
974.345	512.255	12395	12385	12385	12385
974.845	511.755	11990	11990	11990	11990
975.345	511.255	11857.5	11857.5	11857.5	11857.5
975.845	510.755	11757.5	11757.5	11757.5	11757.5
976.345	510.255	11620	11620	11620	11620
976.845	509.755	11425	11425	11425	11425
977.345	509.255	11555	11555	11555	11555
977.845	508.755	11225	11225	11225	11225
978.345	508.255	11370	11370	11370	11370
978.845	507.755	11450	11450	11450	11450
979.345	507.255	11362.5	11362.5	11362.5	11362.5
979.845	506.755	11265	11265	11265	11265
980.345	506.255	11202.5	11202.5	11202.5	11202.5
980.845	505.755	11487.5	11487.5	11487.5	11487.5
981.345	505.255	11387.5	11387.5	11387.5	11387.5
981.845	504.755	11185	11185	11185	11185
982.345	504.255	11497.5	11497.5	11497.5	11497.5
982.845	503.755	11327.5	11327.5	11327.5	11327.5
983.345	503.255	11400	11400	11400	11400
983.845	502.755	11462.5	11462.5	11462.5	11462.5
984.345	502.255	11380	11380	11380	11380
984.845	501.755	11370	11370	11370	11370
985.345	501.255	11527.5	11527.5	11527.5	11527.5
985.845	500.755	11367.5	11367.5	11367.5	11367.5
986.345	500.255	11530	11530	11530	11530
986.845	499.755	11242.5	11242.5	11242.5	11242.5
987.345	499.255	11170	11170	11170	11170
987.845	498.755	11210	11210	11210	11210
988.345	498.255	11460	11460	11460	11460
988.845	497.755	11272.5	11272.5	11272.5	11272.5
989.345	497.255	11412.5	11412.5	11412.5	11412.5
989.845	496.755	11602.5	11602.5	11602.5	11602.5
990.345	496.255	11700	11700	11700	11700
990.845	495.755	11572.5	11572.5	11572.5	11572.5
991.345	495.255	11967.5	11967.5	11967.5	11967.5
991.845	494.755	11767.5	11767.5	11767.5	11767.5
992.345	494.255	11712.5	11712.5	11712.5	11712.5
992.845	493.755	11542.5	11542.5	11542.5	11542.5
993.345	493.255	11640	11640	11640	11640
993.845	492.755	11462.5	11462.5	11462.5	11462.5
994.345	492.255	11465	11465	11465	11465
994.845	491.755	11447.5	11447.5	11447.5	11447.5
995.345	491.255	11470	11470	11470	11470
995.845	490.755	11360	11360	11360	11360
996.345	490.255	11507.5	11507.5	11507.5	11507.5
996.845	489.755	11330	11330	11330	11330
997.345	489.255	11325	11325	11325	11325
997.845	488.755	11375	11375	11375	11375
998.345	488.255	11517.5	11517.5	11517.5	11517.5
998.845	487.755	11487.5	11487.5	11487.5	11487.5
999.345	487.255	11635	11635	11635	11635
999.845	486.755	11425	11425	11425	11425
1000.34	486.255	11410	11410	11410	11410
1000.84	485.755	11572.5	11572.5	11572.5	11572.5
1001.34	485.255	11495	11495	11495	11495
1001.84	484.755	11552.5	11552.5	11552.5	11552.5
1002.34	484.255	11525	11525	11525	11525
1002.84	483.755	11510	11510	11510	11510
1003.34	483.255	11377.5	11377.5	11377.5	11377.5
1003.84	482.755	11570	11570	11570	11570
1004.34	482.255	11525	11525	11525	11525
1004.84	481.755	11565	11565	11565	11565
1005.34	481.255	11490	11490	11490	11490
1005.84	480.755	11437.5	11437.5	11437.5	11437.5
1006.34	480.255	11602.5	11602.5	11602.5	11602.5
1006.84	479.755	11742.5	11742.5	11742.5	11742.5
1007.34	479.255	11432.5	11432.5	11432.5	11432.5
1007.84	478.755	11550	11550	11550	11550
1008.34	478.255	11567.5	11567.5	11567.5	11567.5
1008.84	477.755	11402.5	11402.5	11402.5	11402.5
1009.34	477.255	10877.5	10877.5	10877.5	10877.5
1009.84	476.755	11355	11355	11355	11355
1010.34	476.255	11315	11315	11315	11315
1010.84	475.755	11465	11465	11465	11465
1011.34	475.255	11730	11730	11730	11730
1011.84	474.755	11667.5	11667.5	11667.5	11667.5
1012.34	474.255	11627.5	11627.5	11627.5	11627.5
1012.84	473.755	11695	11695	11695	11695
1013.34	473.255	11545	11545	11545	11545
1013.84	472.755	11657.5	11657.5	11657.5	11657.5
1014.34	472.255	11505	11505	11505	11505
1014.84	471.755	11365	11365	11365	11365
1015.34	471.255	11525	11525	11525	11525
1015.84	470.755	11705	11705	11705	11705
1016.34	470.255	11285	11285	11285	11285
1016.84	469.755	11277.5	11277.5	11277.5	11277.5
1017.34	469.255	11487.5	11487.5	11487.5	11487.5
1017.84	468.755	11587.5	11587.5	11587.5	11587.5
1018.34	468.255	11285	11285	11285	11285
1018.84	467.755	11687.5	11687.5	11687.5	11687.5
1019.34	467.255	11615	11615	11615	11615
1019.84	466.755	11305	11305	11305	11305
1020.34	466.255	11592.5	11592.5	11592.5	11592.5
1020.84	465.755	11625	11625	11625	11625
1021.34	465.255	11450	11450	11450	11450
1021.84	464.755	11252.5	11252.5	11252.5	11252.5
1022.34	464.255	11445	11445	11445	11445
1022.84	463.755	11767.5	11767.5	11767.5	11767.5
1023.34	463.255	11512.5	11512.5	11512.5	11512.5
1023.84	462.755	11807.5	11807.5	11807.5	11807.5
1024.34	462.255	11750	11750	11750	11750
1024.84	461.755	11617.5	11617.5	11617.5	11617.5
1025.34	461.255	11647.5	11647.5	11647.5	11647.5
1025.84	460.755	11557.5	11557.5	11557.5	11557.5
1026.34	460.255	11475	11475	11475	11475
1026.84	459.755	11680	11680	11680	11680
1027.34	459.255	11805	11805	11805	11805
1027.84	458.755	11740	11740	11740	11740
1028.34	458.255	11600	11600	11600	11600
1028.84	457.755	11525	11525	11525	11525
1029.34	457.255	11682.5	11682.5	11682.5	11682.5
1029.84	456.755	11747.5	11747.5	11747.5	11747.5
1030.34	456.255	11802.5	11802.5	11802.5	11802.5
1030.84	455.755	11895	11895	11895	11895
1031.34	455.255	11872.5	11872.5	11872.5	11872.5
1031.84	454.755	11690	11690	11690	11690
1032.34	454.255	11587.5	11587.5	11587.5	11587.5
1032.84	453.755	11487.5	11487.5	11487.5	11487.5
1033.34	453.255	11770	11770	11770	11770
1033.84	452.755	11677.5	11677.5	11677.5	11677.5
1034.34	452.255	11530	11530	11530	11530
1034.84	451.755	11772.5	11772.5	11772.5	11772.5
1035.34	451.255	11650	11650	11650	11650
1035.84	450.755	11687.5	11687.5	11687.5	11687.5
1036.34	450.255	11792.5	11792.5	11792.5	11792.5
1036.84	449.755	11765	11765	11765	11765
1037.34	449.255	12170	12170	12170	12170
1037.84	448.755	11997.5	11997.5	11997.5	11997.5
1038.34	448.255	12037.5	12037.5	12037.5	12037.5
1038.84	447.755	12025	12025	12025	12025
1039.34	447.255	11987.5	11987.5	11987.5	11987.5
1039.84	446.755	11937.5	11937.5	11937.5	11937.5
1040.34	446.255	11922.5	11922.5	11922.5	11922.5
1040.84	445.755	12117.5	12117.5	12117.5	12117.5
1041.34	445.255	12045	12045	12045	12045
1041.84	444.755	11957.5	11957.5	11957.5	11957.5
1042.34	444.255	11862.5	11862.5	11862.5	11862.5
1042.84	443.755	11890	11890	11890	11890
1043.34	443.255	11887.5	11887.5	11887.5	11887.5
1043.84	442.755	11857.5	11857.5	11857.5	11857.5
1044.34	442.255	12020	12020	12020	12020
1044.84	441.755	12092.5	12092.5	12092.5	12092.5
1045.34	441.255	11985	11985	11985	11985
1045.84	440.755	11997.5	11997.5	11997.5	11997.5
1046.34	440.255	12277.5	12277.5	12277.5	12277.5
1046.84	439.755	11910	11910	11910	11910
1047.34	439.255	12157.5	12157.5	12157.5	12157.5
1047.84	438.755	11832.5	11832.5	11832.5	11832.5
1048.34	438.255	11992.5	11992.5	11992.5	11992.5
1048.84	437.755	12090	12090	12090	12090
1049.34	437.255	11955	11955	11955	11955
1049.84	436.755	11990	11990	11990	11990
1050.34	436.255	12052.5	12052.5	12052.5	12052.5
1050.84	435.755	11992.5	11992.5	11992.5	11992.5
1051.34	435.255	12162.5	12162.5	12162.5	12162.5
1051.84	434.755	12045	12045	12045	12045
1052.34	434.255	12087.5	12087.5	12087.5	12087.5
1052.84	433.755	12257.5	12257.5	12257.5	12257.5
1053.34	433.255	11945	11945	11945	11945
1053.84	432.755	11725	11725	11725	11725
1054.34	432.255	11775	11775	11775	11775
1054.84	431.755	12272.5	12272.5	12272.5	12272.5
1055.34	431.255	12440	12440	12440	12440
1055.84	430.755	12095	12095	12095	12095
1056.34	430.255	11827.5	11827.5	11827.5	11827.5
1056.84	429.755	12227.5	12227.5	12227.5	12227.5
1057.34	429.255	12060	12060	12060	12060
1057.84	428.755	12332.5	12332.5	12332.5	12332.5
1058.34	428.255	12270	12270	12270	12270
1058.84	427.755	12300	12300	12300	12300
1059.34	427.255	12222.5	12222.5	12222.5	12222.5
1059.84	426.755	12152.5	12152.5	12152.5	12152.5
1060.34	426.255	12072.5	12072.5	12072.5	12072.5
1060.84	425.755	12262.5	12262.5	12262.5	12262.5
1061.34	425.255	12360	12360	12360	12360
1061.84	424.755	12252.5	12252.5	12252.5	12252.5
1062.34	424.255	12252.5	12252.5	12252.5	12252.5
1062.84	423.755	12375	12375	12375	12375
1063.34	423.255	12462.5	12462.5	12462.5	12462.5
1063.84	422.755	12555	12555	12555	12555
1064.34	422.255	12537.5	12537.5	12537.5	12537.5
1064.84	421.755	12425	12425	12425	12425
1065.34	421.255	12485	12485	12485	12485
1065.84	420.755	12147.5	12147.5	12147.5	12147.5
1066.34	420.255	12277.5	12277.5	12277.5	12277.5
1066.84	419.755	12227.5	12227.5	12227.5	12227.5
1067.34	419.255	12515	12515	12515	12515
1067.84	418.755	12462.5	12462.5	12462.5	12462.5
1068.34	418.255	12602.5	12602.5	12602.5	12602.5
1068.84	417.755	12450	12450	12450	12450
1069.34	417.255	12555	12555	12555	12555
1069.84	416.755	12322.5	12322.5	12322.5	12322.5
1070.34	416.255	12577.5	12577.5	12577.5	12577.5
1070.84	415.755	12415	12415	12415	12415
1071.34	415.255	12460	12460	12460	12460
1071.84	414.755	12567.5	12567.5	12567.5	12567.5
1072.34	414.255	12532.5	12532.5	12532.5	12532.5
1072.84	413.755	12617.5	12617.5	12617.5	12617.5
1073.34	413.255	12590	12590	12590	12590
1073.84	412.755	12480	12480	12480	12480
1074.34	412.255	12640	12640	12640	12640
1074.84	411.755	12870	12870	12870	12870
1075.34	411.255	12810	12810	12810	12810
1075.84	410.755	12412.5	12412.5	12412.5	12412.5
1076.34	410.255	12685	12685	12685	12685
1076.84	409.755	12705	12705	12705	12705
1077.34	409.255	12642.5	12642.5	12642.5	12642.5
1077.84	408.755	12660	12660	12660	12660
1078.34	408.255	12467.5	12467.5	12467.5	12467.5
1078.84	407.755	12510	12510	12510	12510
1079.34	407.255	12697.5	12697.5	12697.5	12697.5
1079.84	406.755	12607.5	12607.5	12607.5	12607.5
1080.34	406.255	12745	12745	12745	12745
1080.84	405.755	12670	12670	12670	12670
1081.34	405.255	12627.5	12627.5	12627.5	12627.5
1081.84	404.755	12620	12620	12620	12620
1082.34	404.255	12732.5	12732.5	12732.5	12732.5
1082.84	403.755	12775	12775	12775	12775
1083.34	403.255	12912.5	12912.5	12912.5	12912.5
1083.84	402.755	12770	12770	12770	12770
1084.34	402.255	12867.5	12867.5	12867.5	12867.5
1084.84	401.755	13155	13155	13155	13155
1085.34	401.255	13155	13155	13155	13155
1085.84	400.755	13470	13470	13470	13470
1086.34	400.255	13242.5	13242.5	13242.5	13242.5
1086.84	399.755	13282.5	13282.5	13282.5	13282.5
1087.34	399.255	13192.5	13192.5	13192.5	13192.5
1087.84	398.755	12862.5	12862.5	12862.5	12862.5
1088.34	398.255	12760	12760	12760	12760
1088.84	397.755	12865	12865	12865	12865
1089.34	397.255	12285	12285	12285	12285
1089.84	396.755	12600	12600	12600	12600
1090.34	396.255	12155	12155	12155	12155
1090.84	395.755	12395	12395	12395	12395
1091.34	395.255	12212.5	12212.5	12212.5	12212.5
1091.84	394.755	12282.5	12282.5	12282.5	12282.5
1092.34	394.255	12567.5	12567.5	12567.5	12567.5
1092.84	393.755	12517.5	12517.5	12517.5	12517.5
1093.34	393.255	12755	12755	12755	12755
1093.84	392.755	12547.5	12547.5	12547.5	12547.5
1094.34	392.255	12517.5	12517.5	12517.5	12517.5
1094.84	391.755	12695	12695	12695	12695
1095.34	391.255	12460	12460	12460	12460
1095.84	390.755	12305	12305	12305	12305
1096.34	390.255	12197.5	12197.5	12197.5	12197.5
1096.84	389.755	12420	12420	12420	12420
1097.34	389.255	12565	12565	12565	12565
1097.84	388.755	12167.5	12167.5	12167.5	12167.5
1098.34	388.255	12530	12530	12530	12530
1098.84	387.755	12302.5	12302.5	12302.5	12302.5
1099.34	387.255	12542.5	12542.5	12542.5	12542.5
1099.84	386.755	12492.5	12492.5	12492.5	12492.5
1100.34	386.255	12570	12570	12570	12570
1100.84	385.755	12692.5	12692.5	12692.5	12692.5
1101.34	385.255	12592.5	12592.5	12592.5	12592.5
1101.84	384.755	12345	12345	12345	12345
1102.34	384.255	12392.5	12392.5	12392.5	12392.5
1102.84	383.755	12925	12925	12925	12925
1103.34	383.255	12925	12925	12925	12925
1103.84	382.755	12770	12770	12770	12770
1104.34	382.255	12575	12575	12575	12575
1104.84	381.755	12645	12645	12645	12645
1105.34	381.255	12460	12460	12460	12460
1105.84	380.755	12875	12875	12875	12875
1106.34	380.255	12717.5	12717.5	12717.5	12717.5
1106.84	379.755	12980	12980	12980	12980
1107.34	379.255	12442.5	12442.5	12442.5	12442.5
1107.84	378.755	12295	12295	12295	12295
1108.34	378.255	12655	12655	12655	12655
1108.84	377.755	12652.5	12652.5	12652.5	12652.5
1109.34	377.255	12705	12705	12705	12705
1109.84	376.755	12760	12760	12760	12760
1110.34	376.255	13050	13050	13050	13050
1110.84	375.755	12965	12965	12965	12965
1111.34	375.255	12650	12650	12650	12650
1111.84	374.755	12932.5	12932.5	12932.5	12932.5
1112.34	374.255	12947.5	12947.5	12947.5	12947.5
1112.84	373.755	13055	13055	13055	13055
1113.34	373.255	12947.5	12947.5	12947.5	12947.5
1113.84	372.755	12687.5	12687.5	12687.5	12687.5
1114.34	372.255	12695	12695	12695	12695
1114.84	371.755	12742.5	12742.5	12742.5	12742.5
1115.34	371.255	12807.5	12807.5	12807.5	12807.5
1115.84	370.755	12520	12520	12520	12520
1116.34	370.255	12432.5	12432.5	12432.5	12432.5
1116.84	369.755	12607.5	12607.5	12607.5	12607.5
1117.34	369.255	12575	12575	12575	12575
1117.84	368.755	12842.5	12842.5	12842.5	12842.5
1118.34	368.255	13022.5	13022.5	13022.5	13022.5
1118.84	367.755	13122.5	13122.5	13122.5	13122.5
1119.34	367.255	13157.5	13157.5	13157.5	13157.5
1119.84	366.755	13155	13155	13155	13155
1120.34	366.255	13115	13115	13115	13115
1120.84	365.755	13130	13130	13130	13130
1121.34	365.255	12892.5	12892.5	12892.5	12892.5
1121.84	364.755	12932.5	12932.5	12932.5	12932.5
1122.34	364.255	12727.5	12727.5	12727.5	12727.5
1122.84	363.755	12860	12860	12860	12860
1123.34	363.255	13087.5	13087.5	13087.5	13087.5
1123.84	362.755	12890	12890	12890	12890
1124.34	362.255	13090	13090	13090	13090
1124.84	361.755	13042.5	13042.5	13042.5	13042.5
1125.34	361.255	12795	12795	12795	12795
1125.84	360.755	12832.5	12832.5	12832.5	12832.5
1126.34	360.255	12970	12970	12970	12970
1126.84	359.755	13177.5	13177.5	13177.5	13177.5
1127.34	359.255	13252.5	13252.5	13252.5	13252.5
1127.84	358.755	13235	13235	13235	13235
1128.34	358.255	13012.5	13012.5	13012.5	13012.5
1128.84	357.755	13330	13330	13330	13330
1129.34	357.255	13192.5	13192.5	13192.5	13192.5
1129.84	356.755	13197.5	13197.5	13197.5	13197.5
1130.34	356.255	13015	13015	13015	13015
1130.84	355.755	13305	13305	13305	13305
1131.34	355.255	13047.5	13047.5	13047.5	13047.5
1131.84	354.755	13047.5	13047.5	13047.5	13047.5
1132.34	354.255	13265	13265	13265	13265
1132.84	353.755	13212.5	13212.5	13212.5	13212.5
1133.34	353.255	13320	13320	13320	13320
1133.84	352.755	13387.5	13387.5	13387.5	13387.5
1134.34	352.255	13177.5	13177.5	13177.5	13177.5
1134.84	351.755	13385	13385	13385	13385
1135.34	351.255	13300	13300	13300	13300
1135.84	350.755	13037.5	13037.5	13037.5	13037.5
1136.34	350.255	13515	13515	13515	13515
1136.84	349.755	13317.5	13317.5	13317.5	13317.5
1137.34	349.255	13327.5	13327.5	13327.5	13327.5
1137.84	348.755	13255	13255	13255	13255
1138.34	348.255	13157.5	13157.5	13157.5	13157.5
1138.84	347.755	13122.5	13122.5	13122.5	13122.5
1139.34	347.255	13215	13215	13215	13215
1139.84	346.755	13380	13380	13380	13380
1140.34	346.255	13455	13455	13455	13455
1140.84	345.755	13542.5	13542.5	13542.5	13542.5
1141.34	345.255	13585	13585	13585	13585
1141.84	344.755	13452.5	13452.5	13452.5	13452.5
1142.34	344.255	13465	13465	13465	13465
1142.84	343.755	13532.5	13532.5	13532.5	13532.5
1143.34	343.255	13367.5	13367.5	13367.5	13367.5
1143.84	342.755	13432.5	13432.5	13432.5	13432.5
1144.34	342.255	13602.5	13602.5	13602.5	13602.5
1144.84	341.755	13475	13475	13475	13475
1145.34	341.255	13375	13375	13375	13375
1145.84	340.755	13322.5	13322.5	13322.5	13322.5
1146.34	340.255	13605	13605	13605	13605
1146.84	339.755	13497.5	13497.5	13497.5	13497.5
1147.34	339.255	13492.5	13492.5	13492.5	13492.5
1147.84	338.755	13707.5	13707.5	13707.5	13707.5
1148.34	338.255	13695	13695	13695	13695
1148.84	337.755	13482.5	13482.5	13482.5	13482.5
1149.34	337.255	13685	13685	13685	13685
1149.84	336.755	13287.5	13287.5	13287.5	13287.5
1150.34	336.255	13572.5	13572.5	13572.5	13572.5
1150.84	335.755	13685	13685	13685	13685
1151.34	335.255	13867.5	13867.5	13867.5	13867.5
1151.84	334.755	13692.5	13692.5	13692.5	13692.5
1152.34	334.255	13722.5	13722.5	13722.5	13722.5
1152.84	333.755	13632.5	13632.5	13632.5	13632.5
1153.34	333.255	13720	13720	13720	13720
1153.84	332.755	13500	13500	13500	13500
1154.34	332.255	13860	13860	13860	13860
1154.84	331.755	13825	13825	13825	13825
1155.34	331.255	13997.5	13997.5	13997.5	13997.5
1155.84	330.755	13995	13995	13995	13995
1156.34	330.255	13682.5	13682.5	13682.5	13682.5
1156.84	329.755	13622.5	13622.5	13622.5	13622.5
1157.34	329.255	13937.5	13937.5	13937.5	13937.5
1157.84	328.755	14067.5	14067.5	14067.5	14067.5
1158.34	328.255	13930	13930	13930	13930
1158.84	327.755	13672.5	13672.5	13672.5	13672.5
1159.34	327.255	13697.5	13697.5	13697.5	13697.5
1159.84	326.755	14185	14185	14185	14185
1160.34	326.255	14257.5	14257.5	14257.5	14257.5
1160.84	325.755	14102.5	14102.5	14102.5	14102.5
1161.34	325.255	13977.5	13977.5	13977.5	13977.5
1161.84	324.755	13942.5	13942.5	13942.5	13942.5
1162.34	324.255	14032.5	14032.5	14032.5	14032.5
1162.84	323.755	13875	13875	13875	13875
1163.34	323.255	13862.5	13862.5	13862.5	13862.5
1163.84	322.755	14107.5	14107.5	14107.5	14107.5
1164.34	322.255	14137.5	14137.5	14137.5	14137.5
1164.84	321.755	14345	14345	14345	14345
1165.34	321.255	14480	14480	14480	14480
1165.84	320.755	14200	14200	14200	14200
1166.34	320.255	14335	14335	14335	14335
1166.84	319.755	14292.5	14292.5	14292.5	14292.5
1167.34	319.255	14032.5	14032.5	14032.5	14032.5
1167.84	318.755	14165	14165	14165	14165
1168.34	318.255	14042.5	14042.5	14042.5	14042.5
1168.84	317.755	14210	14210	14210	14210
1169.34	317.255	14135	14135	14135	14135
1169.84	316.755	14210	14210	14210	14210
1170.34	316.255	14422.5	14422.5	14422.5	14422.5
1170.84	315.755	14210	14210	14210	14210
1171.34	315.255	14585	14585	14585	14585
1171.84	314.755	14345	14345	14345	14345
1172.34	314.255	14162.5	14162.5	14162.5	14162.5
1172.84	313.755	14482.5	14482.5	14482.5	14482.5
1173.34	313.255	14337.5	14337.5	14337.5	14337.5
1173.84	312.755	14682.5	14682.5	14682.5	14682.5
1174.34	312.255	14657.5	14657.5	14657.5	14657.5
1174.84	311.755	14275	14275	14275	14275
1175.34	311.255	14372.5	14372.5	14372.5	14372.5
1175.84	310.755	14515	14515	14515	14515
1176.34	310.255	14542.5	14542.5	14542.5	14542.5
1176.84	309.755	14657.5	14657.5	14657.5	14657.5
1177.34	309.255	14642.5	14642.5	14642.5	14642.5
1177.84	308.755	14447.5	14447.5	14447.5	14447.5
1178.34	308.255	14417.5	14417.5	14417.5	14417.5
1178.84	307.755	14650	14650	14650	14650
1179.34	307.255	14702.5	14702.5	14702.5	14702.5
1179.84	306.755	14492.5	14492.5	14492.5	14492.5
1180.34	306.255	14792.5	14792.5	14792.5	14792.5
1180.84	305.755	14260	14260	14260	14260
1181.34	305.255	14807.5	14807.5	14807.5	14807.5
1181.84	304.755	14852.5	14852.5	14852.5	14852.5
1182.34	304.255	14747.5	14747.5	14747.5	14747.5
1182.84	303.755	14592.5	14592.5	14592.5	14592.5
1183.34	303.255	14597.5	14597.5	14597.5	14597.5
1183.84	302.755	15032.5	15032.5	15032.5	15032.5
1184.34	302.255	15065	15065	15065	15065
1184.84	301.755	14492.5	14492.5	14492.5	14492.5
1185.34	301.255	14577.5	14577.5	14577.5	14577.5
1185.84	300.755	14647.5	14647.5	14647.5	14647.5
1186.34	300.255	14560	14560	14560	14560
1186.84	299.755	14605	14605	14605	14605
1187.34	299.255	14777.5	14777.5	14777.5	14777.5
1187.84	298.755	14935	14935	14935	14935
1188.34	298.255	14797.5	14797.5	14797.5	14797.5
1188.84	297.755	14357.5	14357.5	14357.5	14357.5
1189.34	297.255	14342.5	14342.5	14342.5	14342.5
1189.84	296.755	14372.5	14372.5	14372.5	14372.5
1190.34	296.255	14520	14520	14520	14520
1190.84	295.755	14380	14380	14380	14380
1191.34	295.255	14242.5	14242.5	14242.5	14242.5
1191.84	294.755	14337.5	14337.5	14337.5	14337.5
1192.34	294.255	14402.5	14402.5	14402.5	14402.5
1192.84	293.755	14272.5	14272.5	14272.5	14272.5
1193.34	293.255	14497.5	14497.5	14497.5	14497.5
1193.84	292.755	14837.5	14837.5	14837.5	14837.5
1194.34	292.255	14685	14685	14685	14685
1194.84	291.755	14250	14250	14250	14250
1195.34	291.255	14775	14775	14775	14775
1195.84	290.755	14710	14710	14710	14710
1196.34	290.255	15157.5	15157.6	15157.5	15157.6
1196.84	289.755	15107.5	15108.2	15107.5	15108.2
1197.34	289.255	15750	15753.5	15750	15753.5
1197.84	288.755	16335	16350.4	16335	16350.4
1198.34	288.255	15932.5	15991.9	15932.5	15991.9
1198.84	287.755	16270	16469.6	16270	16469.6
1199.34	287.255	16802.5	17389.5	16802.5	17389.5
1199.84	286.755	17820	19326.7	17820	19326.7
1200.34	286.255	19682.5	23022.1	19682.5	23022.1
1200.84	285.755	22380	28691.6	22380	28691.6
1201.34	285.255	26187.5	36148.3	26187.5	36148.3
1201.84	284.755	28045	40830.1	28045	40830.1
1202.34	284.255	26895	39986.8	26895	39986.8
1202.84	283.755	23210	33871.9	23210	33871.9
1203.34	283.255	18762.5	25793.5	18762.5	25793.5
1203.84	282.755	15957.5	19807	15957.5	19807
1204.34	282.255	14745	16535.8	14745	16535.8
1204.84	281.755	14597.5	15316.7	14597.5	15316.7
1205.34	281.255	14755	15006	14755	15006
1205.84	280.755	14545	14621.6	14545	14621.6
1206.34	280.255	14355	14375.5	14355	14375.5
1206.84	279.755	14232.5	14237.3	14232.5	14237.3
1207.34	279.255	14197.5	14198.5	14197.5	14198.5
1207.84	278.755	14262.5	14262.7	14262.5	14262.7
1208.34	278.255	14462.5	14462.5	14462.5	14462.5
1208.84	277.755	14452.5	14452.5	14452.5	14452.5
1209.34	277.255	14567.5	14567.5	14567.5	14567.5
1209.84	276.755	14247.5	14247.5	14247.5	14247.5
1210.34	276.255	14120	14120	14120	14120
1210.84	275.755	14032.5	14032.5	14032.5	14032.5
1211.34	275.255	14432.5	14432.5	14432.5	14432.5
1211.84	274.755	14380	14380	14380	14380
1212.34	274.255	14332.5	14332.5	14332.5	14332.5
1212.84	273.755	14300	14300	14300	14300
1213.34	273.255	14582.5	14582.5	14582.5	14582.5
1213.84	272.755	14522.5	14522.5	14522.5	14522.5
1214.34	272.255	14317.5	14317.5	14317.5	14317.5
1214.84	271.755	14585	14585	14585	14585
1215.34	271.255	14550	14550	14550	14550
1215.84	270.755	14727.5	14727.5	14727.5	14727.5
1216.34	270.255	14597.5	14597.5	14597.5	14597.5
1216.84	269.755	14612.5	14612.5	14612.5	14612.5
1217.34	269.255	14177.5	14177.5	14177.5	14177.5
1217.84	268.755	14520	14520	14520	14520
1218.34	268.255	14605	14605	14605	14605
1218.84	267.755	14482.5	14482.5	14482.5	14482.5
1219.34	267.255	14392.5	14392.5	14392.5	14392.5
1219.84	266.755	14292.5	14292.5	14292.5	14292.5
1220.34	266.255	14582.5	14582.5	14582.5	14582.5
1220.84	265.755	14322.5	14322.5	14322.5	14322.5
1221.34	265.255	14540	14540	14540	14540
1221.84	264.755	14580	14580	14580	14580
1222.34	264.255	14552.5	14552.5	14552.5	14552.5
1222.84	263.755	14535	14535	14535	14535
1223.34	263.255	14430	14430	14430	14430
1223.84	262.755	14445	14445	14445	14445
1224.34	262.255	14740	14740	14740	14740
1224.84	261.755	14600	14600	14600	14600
1225.34	261.255	14485	14485	14485	14485
1225.84	260.755	14560	14560	14560	14560
1226.34	260.255	14587.5	14587.5	14587.5	14587.5
1226.84	259.755	14620	14620	14620	14620
1227.34	259.255	14655	14655	14655	14655
1227.84	258.755	14485	14485	14485	14485
1228.34	258.255	14752.5	14752.5	14752.5	14752.5
1228.84	257.755	14625	14625	14625	14625
1229.34	257.255	14780	14780	14780	14780
1229.84	256.755	14845	14845	14845	14845
1230.34	256.255	14677.5	14677.5	14677.5	14677.5
1230.84	255.755	14822.5	14822.5	14822.5	14822.5
1231.34	255.255	14815	14815	14815	14815
1231.84	254.755	14662.5	14662.5	14662.5	14662.5
1232.34	254.255	14970	14970	14970	14970
1232.84	253.755	14925	14925	14925	14925
1233.34	253.255	14890	14890	14890	14890
1233.84	252.755	14707.5	14707.5	14707.5	14707.5
1234.34	252.255	14895	14895	14895	14895
1234.84	251.755	14865	14865	14865	14865
1235.34	251.255	14435	14435	14435	14435
1235.84	250.755	14800	14800	14800	14800
1236.34	250.255	14977.5	14977.5	14977.5	14977.5
1236.84	249.755	15027.5	15027.5	15027.5	15027.5
1237.34	249.255	15032.5	15032.5	15032.5	15032.5
1237.84	248.755	15152.5	15152.5	15152.5	15152.5
1238.34	248.255	15085	15085	15085	15085
1238.84	247.755	14907.5	14907.5	14907.5	14907.5
1239.34	247.255	14942.5	14942.5	14942.5	14942.5
1239.84	246.755	15132.5	15132.5	15132.5	15132.5
1240.34	246.255	15262.5	15262.5	15262.5	15262.5
1240.84	245.755	15312.5	15312.5	15312.5	15312.5
1241.34	245.255	15380	15380	15380	15380
1241.84	244.755	15027.5	15027.5	15027.5	15027.5
1242.34	244.255	15085	15085	15085	15085
1242.84	243.755	15187.5	15187.5	15187.5	15187.5
1243.34	243.255	14922.5	14922.5	14922.5	14922.5
1243.84	242.755	14917.5	14917.5	14917.5	14917.5
1244.34	242.255	14992.5	14992.5	14992.5	14992.5
1244.84	241.755	15005	15005	15005	15005
1245.34	241.255	15300	15300	15300	15300
1245.84	240.755	15132.5	15132.5	15132.5	15132.5
1246.34	240.255	14990	14990	14990	14990
1246.84	239.755	14772.5	14772.5	14772.5	14772.5
1247.34	239.255	15042.5	15042.5	15042.5	15042.5
1247.84	238.755	14980	14980	14980	14980
1248.34	238.255	15162.5	15162.5	15162.5	15162.5
1248.84	237.755	15335	15335	15335	15335
1249.34	237.255	15415	15415	15415	15415
1249.84	236.755	15090	15090	15090	15090
1250.34	236.255	14945	14945	14945	14945
1250.84	235.755	15247.5	15247.5	15247.5	15247.5
1251.34	235.255	15162.5	15162.5	15162.5	15162.5
1251.84	234.755	15285	15285	15285	15285
1252.34	234.255	15395	15395	15395	15395
1252.84	233.755	15590	15590	15590	15590
1253.34	233.255	15550	15550	15550	15550
1253.84	232.755	15415	15415	15415	15415
1254.34	232.255	15215	15215	15215	15215
1254.84	231.755	14942.5	14942.5	14942.5	14942.5
1255.34	231.255	15330	15330	15330	15330
1255.84	230.755	15477.5	15477.5	15477.5	15477.5
1256.34	230.255	15625	15625	15625	15625
1256.84	229.755	15707.5	15707.5	15707.5	15707.5
1257.34	229.255	15305	15305	15305	15305
1257.84	228.755	15325	15325	15325	15325
1258.34	228.255	15497.5	15497.5	15497.5	15497.5
1258.84	227.755	15362.5	15362.5	15362.5	15362.5
1259.34	227.255	15440	15440	15440	15440
1259.84	226.755	15317.5	15317.5	15317.5	15317.5
1260.34	226.255	15535	15535	15535	15535
1260.84	225.755	15527.5	15527.5	15527.5	15527.5
1261.34	225.255	15462.5	15462.5	15462.5	15462.5
1261.84	224.755	15612.5	15612.5	15612.5	15612.5
1262.34	224.255	15462.5	15462.5	15462.5	15462.5
1262.84	223.755	15592.5	15592.5	15592.5	15592.5
1263.34	223.255	15645	15645	15645	15645
1263.84	222.755	15670	15670	15670	15670
1264.34	222.255	15520	15520	15520	15520
1264.84	221.755	15312.5	15312.5	15312.5	15312.5
1265.34	221.255	15477.5	15477.5	15477.5	15477.5
1265.84	220.755	15477.5	15477.5	15477.5	15477.5
1266.34	220.255	15732.5	15732.5	15732.5	15732.5
1266.84	219.755	15757.5	15757.5	15757.5	15757.5
1267.34	219.255	15505	15505	15505	15505
1267.84	218.755	15887.5	15887.5	15887.5	15887.5
1268.34	218.255	15832.5	15832.5	15832.5	15832.5
1268.84	217.755	15327.5	15327.5	15327.5	15327.5
1269.34	217.255	15897.5	15897.5	15897.5	15897.5
1269.84	216.755	15702.5	15702.5	15702.5	15702.5
1270.34	216.255	15567.5	15567.5	15567.5	15567.5
1270.84	215.755	15940	15940	15940	15940
1271.34	215.255	15605	15605	15605	15605
1271.84	214.755	15567.5	15567.5	15567.5	15567.5
1272.34	214.255	15725	15725	15725	15725
1272.84	213.755	15697.5	15697.5	15697.5	15697.5
1273.34	213.255	15732.5	15732.5	15732.5	15732.5
1273.84	212.755	15842.5	15842.5	15842.5	15842.5
1274.34	212.255	15612.5	15612.5	15612.5	15612.5
1274.84	211.755	15830	15830	15830	15830
1275.34	211.255	15837.5	15837.5	15837.5	15837.5
1275.84	210.755	15865	15865	15865	15865
1276.34	210.255	16070	16070	16070	16070
1276.84	209.755	16230	16230	16230	16230
1277.34	209.255	16220	16220	16220	16220
1277.84	208.755	15995	15995	15995	15995
1278.34	208.255	15940	15940	15940	15940
1278.84	207.755	15655	15655	15655	15655
1279.34	207.255	15972.5	15972.5	15972.5	15972.5
1279.84	206.755	16115	16115	16115	16115
1280.34	206.255	16065	16065	16065	16065
1280.84	205.755	15982.5	15982.5	15982.5	15982.5
1281.34	205.255	16057.5	16057.5	16057.5	16057.5
1281.84	204.755	16005	16005	16005	16005
1282.34	204.255	16067.5	16067.5	16067.5	16067.5
1282.84	203.755	16300	16300	16300	16300
1283.34	203.255	16100	16100	16100	16100
1283.84	202.755	16042.5	16042.5	16042.5	16042.5
1284.34	202.255	16077.5	16077.5	16077.5	16077.5
[truncated: 414 more rows]

[truncated: 7 more sheets: XPS_LibraryC_V38_pre_reg1, XPS_LibraryC_V38_pre_reg2, XPS_LibraryC_V38_pre_reg3, XPS_LibraryC_V38_post_survey, XPS_LibraryC_V38_post_reg1, XPS_LibraryC_V38_post_reg2, XPS_LibraryC_V38_post_reg3]
